# Supplementary material
Source: ML conference proceedings conference paper supplement (https://openreview.net/forum?id=xggSxCFQbA)
Supplement: supplementary_material [file actual_spending.xlsx]

## Sheet: Sheet1
Department	Category	Month	Actual_Amount
Engineering	Salaries	2023-01-31	152765
Engineering	Salaries	2023-02-28	153616
Engineering	Salaries	2023-03-31	159290
Engineering	Salaries	2023-04-30	189645
Engineering	Salaries	2023-05-31	168534
Engineering	Salaries	2023-06-30	189471
Engineering	Salaries	2023-07-31	203254
Engineering	Salaries	2023-08-31	147050
Engineering	Salaries	2023-09-30	153117
Engineering	Salaries	2023-10-31	145857
Engineering	Salaries	2023-11-30	176316
Engineering	Salaries	2023-12-31	158259
Engineering	Software	2023-01-31	18118.3
Engineering	Software	2023-02-28	23141.4
Engineering	Software	2023-03-31	17629.3
Engineering	Software	2023-04-30	18863.4
Engineering	Software	2023-05-31	17723.2
Engineering	Software	2023-06-30	20412.7
Engineering	Software	2023-07-31	20402.2
Engineering	Software	2023-08-31	18135.3
Engineering	Software	2023-09-30	17399.8
Engineering	Software	2023-10-31	17972.8
Engineering	Software	2023-11-30	21140.7
Engineering	Software	2023-12-31	20827.7
Engineering	Travel	2023-01-31	5154.99
Engineering	Travel	2023-02-28	5037.13
Engineering	Travel	2023-03-31	5128.32
Engineering	Travel	2023-04-30	4644.8
Engineering	Travel	2023-05-31	5302.73
Engineering	Travel	2023-06-30	6073.22
Engineering	Travel	2023-07-31	5770.15
Engineering	Travel	2023-08-31	5018.52
Engineering	Travel	2023-09-30	5403.63
Engineering	Travel	2023-10-31	5043.79
Engineering	Travel	2023-11-30	6293.53
Engineering	Travel	2023-12-31	6254.94
Engineering	Office Supplies	2023-01-31	9799.7
Engineering	Office Supplies	2023-02-28	9440.95
Engineering	Office Supplies	2023-03-31	10014.4
Engineering	Office Supplies	2023-04-30	10059.4
Engineering	Office Supplies	2023-05-31	9545.3
Engineering	Office Supplies	2023-06-30	11307
Engineering	Office Supplies	2023-07-31	10283.2
Engineering	Office Supplies	2023-08-31	12735.6
Engineering	Office Supplies	2023-09-30	7151.82
Engineering	Office Supplies	2023-10-31	10290.2
Engineering	Office Supplies	2023-11-30	11688.5
Engineering	Office Supplies	2023-12-31	11233.5
Engineering	Training	2023-01-31	8065.73
Engineering	Training	2023-02-28	8340.47
Engineering	Training	2023-03-31	7988.44
Engineering	Training	2023-04-30	8304.23
Engineering	Training	2023-05-31	8400.7
Engineering	Training	2023-06-30	8514.02
Engineering	Training	2023-07-31	8738.44
Engineering	Training	2023-08-31	7675.55
Engineering	Training	2023-09-30	8164.07
Engineering	Training	2023-10-31	8373.84
Engineering	Training	2023-11-30	9573.65
Engineering	Training	2023-12-31	9894.27
Engineering	Marketing	2023-01-31	5952.99
Engineering	Marketing	2023-02-28	5671.8
Engineering	Marketing	2023-03-31	5793.63
Engineering	Marketing	2023-04-30	5865.17
Engineering	Marketing	2023-05-31	5483.3
Engineering	Marketing	2023-06-30	6011.49
Engineering	Marketing	2023-07-31	6051.04
Engineering	Marketing	2023-08-31	5425.04
Engineering	Marketing	2023-09-30	5880.1
Engineering	Marketing	2023-10-31	5838.61
Engineering	Marketing	2023-11-30	6664.25
Engineering	Marketing	2023-12-31	6622.43
Engineering	Equipment	2023-01-31	12892.6
Engineering	Equipment	2023-02-28	12925.4
Engineering	Equipment	2023-03-31	14046.6
Engineering	Equipment	2023-04-30	13491.5
Engineering	Equipment	2023-05-31	13612
Engineering	Equipment	2023-06-30	14207.6
Engineering	Equipment	2023-07-31	14730.4
Engineering	Equipment	2023-08-31	13112.6
Engineering	Equipment	2023-09-30	13586.8
Engineering	Equipment	2023-10-31	13331.1
Engineering	Equipment	2023-11-30	15837.5
Engineering	Equipment	2023-12-31	15921.3
Sales	Salaries	2023-01-31	169012
Sales	Salaries	2023-02-28	164822
Sales	Salaries	2023-03-31	162404
Sales	Salaries	2023-04-30	173766
Sales	Salaries	2023-05-31	170856
Sales	Salaries	2023-06-30	180736
Sales	Salaries	2023-07-31	196948
Sales	Salaries	2023-08-31	167931
Sales	Salaries	2023-09-30	171510
Sales	Salaries	2023-10-31	166987
Sales	Salaries	2023-11-30	206530
Sales	Salaries	2023-12-31	209902
Sales	Software	2023-01-31	17593.7
Sales	Software	2023-02-28	17584.5
Sales	Software	2023-03-31	19189.5
Sales	Software	2023-04-30	17435.6
Sales	Software	2023-05-31	18891.4
Sales	Software	2023-06-30	19216.2
Sales	Software	2023-07-31	19231.6
Sales	Software	2023-08-31	17888
Sales	Software	2023-09-30	17551.6
Sales	Software	2023-10-31	18638.5
Sales	Software	2023-11-30	21489.2
Sales	Software	2023-12-31	20861.1
Sales	Travel	2023-01-31	3581.26
Sales	Travel	2023-02-28	3676.71
Sales	Travel	2023-03-31	3640.81
Sales	Travel	2023-04-30	3535.84
Sales	Travel	2023-05-31	3635.52
Sales	Travel	2023-06-30	3790.24
Sales	Travel	2023-07-31	4016.79
Sales	Travel	2023-08-31	3680.61
Sales	Travel	2023-09-30	3553.56
Sales	Travel	2023-10-31	3564.68
Sales	Travel	2023-11-30	4385.16
Sales	Travel	2023-12-31	4553.43
Sales	Office Supplies	2023-01-31	6704.58
Sales	Office Supplies	2023-02-28	7106.2
Sales	Office Supplies	2023-03-31	7288.94
Sales	Office Supplies	2023-04-30	6727.83
Sales	Office Supplies	2023-05-31	7089
Sales	Office Supplies	2023-06-30	7568.94
Sales	Office Supplies	2023-07-31	7535.68
Sales	Office Supplies	2023-08-31	7152.98
Sales	Office Supplies	2023-09-30	7079.85
Sales	Office Supplies	2023-10-31	7242.27
Sales	Office Supplies	2023-11-30	8252.75
Sales	Office Supplies	2023-12-31	8414.01
Sales	Training	2023-01-31	3877.43
Sales	Training	2023-02-28	4381.79
Sales	Training	2023-03-31	4668.03
Sales	Training	2023-04-30	4640.33
Sales	Training	2023-05-31	4374.59
Sales	Training	2023-06-30	4809.02
Sales	Training	2023-07-31	4898.77
Sales	Training	2023-08-31	4567.68
Sales	Training	2023-09-30	4740.8
Sales	Training	2023-10-31	4490.53
Sales	Training	2023-11-30	5389.84
Sales	Training	2023-12-31	5411.2
Sales	Marketing	2023-01-31	8442.59
Sales	Marketing	2023-02-28	8979.16
Sales	Marketing	2023-03-31	8669.79
Sales	Marketing	2023-04-30	9282.32
Sales	Marketing	2023-05-31	9118.39
Sales	Marketing	2023-06-30	9538.44
Sales	Marketing	2023-07-31	7647.78
Sales	Marketing	2023-08-31	9055.34
Sales	Marketing	2023-09-30	8523.8
Sales	Marketing	2023-10-31	9091.57
Sales	Marketing	2023-11-30	10103.9
Sales	Marketing	2023-12-31	10110.1
Sales	Equipment	2023-01-31	7513.62
Sales	Equipment	2023-02-28	7610.36
Sales	Equipment	2023-03-31	8864.85
Sales	Equipment	2023-04-30	7553.08
Sales	Equipment	2023-05-31	7294.34
Sales	Equipment	2023-06-30	8124.32
Sales	Equipment	2023-07-31	8228.03
Sales	Equipment	2023-08-31	7722.11
Sales	Equipment	2023-09-30	7420.51
Sales	Equipment	2023-10-31	7636.05
Sales	Equipment	2023-11-30	8553.6
Sales	Equipment	2023-12-31	9200.36
Marketing	Salaries	2023-01-31	131105
Marketing	Salaries	2023-02-28	134181
Marketing	Salaries	2023-03-31	130197
Marketing	Salaries	2023-04-30	99554.3
Marketing	Salaries	2023-05-31	134228
Marketing	Salaries	2023-06-30	134522
Marketing	Salaries	2023-07-31	134244
Marketing	Salaries	2023-08-31	131464
Marketing	Salaries	2023-09-30	122937
Marketing	Salaries	2023-10-31	125071
Marketing	Salaries	2023-11-30	149548
Marketing	Salaries	2023-12-31	147181
Marketing	Software	2023-01-31	6503.26
Marketing	Software	2023-02-28	6540.74
Marketing	Software	2023-03-31	6889.86
Marketing	Software	2023-04-30	6670.8
Marketing	Software	2023-05-31	6668.86
Marketing	Software	2023-06-30	8425.39
Marketing	Software	2023-07-31	7285.81
Marketing	Software	2023-08-31	6706.43
Marketing	Software	2023-09-30	6652.44
Marketing	Software	2023-10-31	6622.33
Marketing	Software	2023-11-30	8054.89
Marketing	Software	2023-12-31	7797.02
Marketing	Travel	2023-01-31	5449.57
Marketing	Travel	2023-02-28	5792.03
Marketing	Travel	2023-03-31	5536.23
Marketing	Travel	2023-04-30	5329.15
Marketing	Travel	2023-05-31	5650.55
Marketing	Travel	2023-06-30	6375.43
Marketing	Travel	2023-07-31	6011.54
Marketing	Travel	2023-08-31	5354.89
Marketing	Travel	2023-09-30	5676.18
Marketing	Travel	2023-10-31	6191.08
Marketing	Travel	2023-11-30	6757.27
Marketing	Travel	2023-12-31	6537.67
Marketing	Office Supplies	2023-01-31	6843.59
Marketing	Office Supplies	2023-02-28	7150.79
Marketing	Office Supplies	2023-03-31	7412.07
Marketing	Office Supplies	2023-04-30	7143.38
Marketing	Office Supplies	2023-05-31	6978.37
Marketing	Office Supplies	2023-06-30	7953.34
Marketing	Office Supplies	2023-07-31	8072.77
Marketing	Office Supplies	2023-08-31	7285.54
Marketing	Office Supplies	2023-09-30	6896.52
Marketing	Office Supplies	2023-10-31	6732.8
Marketing	Office Supplies	2023-11-30	8248.1
Marketing	Office Supplies	2023-12-31	8528.99
Marketing	Training	2023-01-31	6664.59
Marketing	Training	2023-02-28	6699.01
Marketing	Training	2023-03-31	6743.61
Marketing	Training	2023-04-30	6385.21
Marketing	Training	2023-05-31	6485.26
Marketing	Training	2023-06-30	7086.04
Marketing	Training	2023-07-31	7161.84
Marketing	Training	2023-08-31	6297.08
Marketing	Training	2023-09-30	6412.45
Marketing	Training	2023-10-31	6386.36
Marketing	Training	2023-11-30	7980.25
Marketing	Training	2023-12-31	7950.23
Marketing	Marketing	2023-01-31	6453.55
Marketing	Marketing	2023-02-28	6292.42
Marketing	Marketing	2023-03-31	6543.92
Marketing	Marketing	2023-04-30	6457.14
Marketing	Marketing	2023-05-31	6702.47
Marketing	Marketing	2023-06-30	6893.51
Marketing	Marketing	2023-07-31	6999.54
Marketing	Marketing	2023-08-31	6682.7
Marketing	Marketing	2023-09-30	6632.11
Marketing	Marketing	2023-10-31	6565.62
Marketing	Marketing	2023-11-30	7995.54
Marketing	Marketing	2023-12-31	8187.35
Marketing	Equipment	2023-01-31	9808.59
Marketing	Equipment	2023-02-28	10651.9
Marketing	Equipment	2023-03-31	9783.16
Marketing	Equipment	2023-04-30	10379
Marketing	Equipment	2023-05-31	9999.21
Marketing	Equipment	2023-06-30	11621.4
Marketing	Equipment	2023-07-31	10758.8
Marketing	Equipment	2023-08-31	10166.7
Marketing	Equipment	2023-09-30	10301.8
Marketing	Equipment	2023-10-31	12811.4
Marketing	Equipment	2023-11-30	12088.2
Marketing	Equipment	2023-12-31	12065.3
HR	Salaries	2023-01-31	146623
HR	Salaries	2023-02-28	140975
HR	Salaries	2023-03-31	142455
HR	Salaries	2023-04-30	145378
HR	Salaries	2023-05-31	140027
HR	Salaries	2023-06-30	157786
HR	Salaries	2023-07-31	151891
HR	Salaries	2023-08-31	109845
HR	Salaries	2023-09-30	140218
HR	Salaries	2023-10-31	140257
HR	Salaries	2023-11-30	171622
HR	Salaries	2023-12-31	168074
HR	Software	2023-01-31	10448
HR	Software	2023-02-28	10634.6
HR	Software	2023-03-31	11003.8
HR	Software	2023-04-30	8411.7
HR	Software	2023-05-31	10953.2
HR	Software	2023-06-30	12378.5
HR	Software	2023-07-31	12281.6
HR	Software	2023-08-31	10579.4
HR	Software	2023-09-30	10870.5
HR	Software	2023-10-31	10702.1
HR	Software	2023-11-30	12564.8
HR	Software	2023-12-31	9504.35
HR	Travel	2023-01-31	7387.81
HR	Travel	2023-02-28	7271.06
HR	Travel	2023-03-31	7736.55
HR	Travel	2023-04-30	7673.38
HR	Travel	2023-05-31	7157.46
HR	Travel	2023-06-30	7948.34
HR	Travel	2023-07-31	8314.96
HR	Travel	2023-08-31	7501.75
HR	Travel	2023-09-30	7147.33
HR	Travel	2023-10-31	7685.13
HR	Travel	2023-11-30	8775.78
HR	Travel	2023-12-31	9333.1
HR	Office Supplies	2023-01-31	5294.1
HR	Office Supplies	2023-02-28	5184.57
HR	Office Supplies	2023-03-31	5443.69
HR	Office Supplies	2023-04-30	5155.49
HR	Office Supplies	2023-05-31	5385.08
HR	Office Supplies	2023-06-30	6052.5
HR	Office Supplies	2023-07-31	5701.54
HR	Office Supplies	2023-08-31	5923.1
HR	Office Supplies	2023-09-30	5350.86
HR	Office Supplies	2023-10-31	5083.01
HR	Office Supplies	2023-11-30	7621.26
HR	Office Supplies	2023-12-31	6544.67
HR	Training	2023-01-31	4966.41
HR	Training	2023-02-28	5251.73
HR	Training	2023-03-31	4984.63
HR	Training	2023-04-30	4931.73
HR	Training	2023-05-31	4819.27
HR	Training	2023-06-30	5595.79
HR	Training	2023-07-31	5516.31
HR	Training	2023-08-31	5017.7
HR	Training	2023-09-30	5077.97
HR	Training	2023-10-31	4823.08
HR	Training	2023-11-30	6163.31
HR	Training	2023-12-31	7335.33
HR	Marketing	2023-01-31	3423.5
HR	Marketing	2023-02-28	3208.33
HR	Marketing	2023-03-31	3335.67
HR	Marketing	2023-04-30	3463.01
HR	Marketing	2023-05-31	3099.8
HR	Marketing	2023-06-30	3732.94
HR	Marketing	2023-07-31	3576.63
HR	Marketing	2023-08-31	3334.43
HR	Marketing	2023-09-30	3421.51
HR	Marketing	2023-10-31	3185.54
HR	Marketing	2023-11-30	3983.31
HR	Marketing	2023-12-31	3953.21
HR	Equipment	2023-01-31	10857.2
HR	Equipment	2023-02-28	10150.9
HR	Equipment	2023-03-31	9228.04
HR	Equipment	2023-04-30	10919.2
HR	Equipment	2023-05-31	7492.07
HR	Equipment	2023-06-30	11777.8
HR	Equipment	2023-07-31	11374
HR	Equipment	2023-08-31	10105.5
HR	Equipment	2023-09-30	10530.1
HR	Equipment	2023-10-31	10009.4
HR	Equipment	2023-11-30	12159.3
HR	Equipment	2023-12-31	12264.4
Operations	Salaries	2023-01-31	86412.6
Operations	Salaries	2023-02-28	86230.4
Operations	Salaries	2023-03-31	91943.3
Operations	Salaries	2023-04-30	87915.3
Operations	Salaries	2023-05-31	93300.9
Operations	Salaries	2023-06-30	79144.5
Operations	Salaries	2023-07-31	95659.6
Operations	Salaries	2023-08-31	90305
Operations	Salaries	2023-09-30	94193.4
Operations	Salaries	2023-10-31	91288.4
Operations	Salaries	2023-11-30	106538
Operations	Salaries	2023-12-31	103171
Operations	Software	2023-01-31	13281.6
Operations	Software	2023-02-28	14000.2
Operations	Software	2023-03-31	13537.9
Operations	Software	2023-04-30	13905.2
Operations	Software	2023-05-31	13722.4
Operations	Software	2023-06-30	14560.8
Operations	Software	2023-07-31	15459.5
Operations	Software	2023-08-31	9742.2
Operations	Software	2023-09-30	13276.9
Operations	Software	2023-10-31	13781.6
Operations	Software	2023-11-30	15828.1
Operations	Software	2023-12-31	16284
Operations	Travel	2023-01-31	6300.09
Operations	Travel	2023-02-28	5918.77
Operations	Travel	2023-03-31	6257.23
Operations	Travel	2023-04-30	6030.32
Operations	Travel	2023-05-31	6110.85
Operations	Travel	2023-06-30	6990.23
Operations	Travel	2023-07-31	5311.15
Operations	Travel	2023-08-31	5789.26
Operations	Travel	2023-09-30	6185.67
Operations	Travel	2023-10-31	5798.55
Operations	Travel	2023-11-30	7326.8
Operations	Travel	2023-12-31	7533.57
Operations	Office Supplies	2023-01-31	7631.1
Operations	Office Supplies	2023-02-28	7975.57
Operations	Office Supplies	2023-03-31	9474.12
Operations	Office Supplies	2023-04-30	8072.82
Operations	Office Supplies	2023-05-31	8090.93
Operations	Office Supplies	2023-06-30	9102.21
Operations	Office Supplies	2023-07-31	8770.53
Operations	Office Supplies	2023-08-31	8331.64
Operations	Office Supplies	2023-09-30	7578.26
Operations	Office Supplies	2023-10-31	7719.19
Operations	Office Supplies	2023-11-30	7605.68
Operations	Office Supplies	2023-12-31	9285.96
Operations	Training	2023-01-31	2673.9
Operations	Training	2023-02-28	2606.74
Operations	Training	2023-03-31	2908.05
Operations	Training	2023-04-30	2593.36
Operations	Training	2023-05-31	2532.93
Operations	Training	2023-06-30	2855.63
Operations	Training	2023-07-31	2832.37
Operations	Training	2023-08-31	2618.71
Operations	Training	2023-09-30	2817.78
Operations	Training	2023-10-31	2624.1
Operations	Training	2023-11-30	2995.04
Operations	Training	2023-12-31	3184.35
Operations	Marketing	2023-01-31	3453.48
Operations	Marketing	2023-02-28	3518.24
Operations	Marketing	2023-03-31	3604.86
Operations	Marketing	2023-04-30	3532.36
Operations	Marketing	2023-05-31	3464.18
Operations	Marketing	2023-06-30	3683.12
Operations	Marketing	2023-07-31	3891.98
Operations	Marketing	2023-08-31	3303.67
Operations	Marketing	2023-09-30	3473.88
Operations	Marketing	2023-10-31	3336.75
Operations	Marketing	2023-11-30	3980.18
Operations	Marketing	2023-12-31	4026.77
Operations	Equipment	2023-01-31	13357.1
Operations	Equipment	2023-02-28	13719
Operations	Equipment	2023-03-31	14238.6
Operations	Equipment	2023-04-30	14282.1
Operations	Equipment	2023-05-31	14244.9
Operations	Equipment	2023-06-30	14539.3
Operations	Equipment	2023-07-31	15049.8
Operations	Equipment	2023-08-31	13808.4
Operations	Equipment	2023-09-30	13945.2
Operations	Equipment	2023-10-31	17654.3
Operations	Equipment	2023-11-30	17245.2
Operations	Equipment	2023-12-31	16578.6
