# Supplementary material
Source: ML conference proceedings conference paper supplement (https://openreview.net/forum?id=xggSxCFQbA)
Supplement: supplementary_material [file balance_sheet_q1.pdf]

[PDF Document Placeholder]

Quarter 1 Balance Sheet

Assets: $1,200,000
Liabilities: $500,000
Equity: $700,000

Reviewed by: Nathan Cho
