# Supplementary material
Source: ML conference proceedings conference paper supplement (https://openreview.net/forum?id=xggSxCFQbA)
Supplement: supplementary_material [file budget.xlsx]

## Sheet: Sheet1
Department	Category	Month	Budgeted_Amount
Engineering	Salaries	2023-01-31	153281
Engineering	Salaries	2023-02-28	153281
Engineering	Salaries	2023-03-31	153281
Engineering	Salaries	2023-04-30	153281
Engineering	Salaries	2023-05-31	153281
Engineering	Salaries	2023-06-30	168609
Engineering	Salaries	2023-07-31	168609
Engineering	Salaries	2023-08-31	153281
Engineering	Salaries	2023-09-30	153281
Engineering	Salaries	2023-10-31	153281
Engineering	Salaries	2023-11-30	183937
Engineering	Salaries	2023-12-31	183937
Engineering	Software	2023-01-31	18064.3
Engineering	Software	2023-02-28	18064.3
Engineering	Software	2023-03-31	18064.3
Engineering	Software	2023-04-30	18064.3
Engineering	Software	2023-05-31	18064.3
Engineering	Software	2023-06-30	19870.7
Engineering	Software	2023-07-31	19870.7
Engineering	Software	2023-08-31	18064.3
Engineering	Software	2023-09-30	18064.3
Engineering	Software	2023-10-31	18064.3
Engineering	Software	2023-11-30	21677.1
Engineering	Software	2023-12-31	21677.1
Engineering	Travel	2023-01-31	5275.28
Engineering	Travel	2023-02-28	5275.28
Engineering	Travel	2023-03-31	5275.28
Engineering	Travel	2023-04-30	5275.28
Engineering	Travel	2023-05-31	5275.28
Engineering	Travel	2023-06-30	5802.81
Engineering	Travel	2023-07-31	5802.81
Engineering	Travel	2023-08-31	5275.28
Engineering	Travel	2023-09-30	5275.28
Engineering	Travel	2023-10-31	5275.28
Engineering	Travel	2023-11-30	6330.34
Engineering	Travel	2023-12-31	6330.34
Engineering	Office Supplies	2023-01-31	9828.96
Engineering	Office Supplies	2023-02-28	9828.96
Engineering	Office Supplies	2023-03-31	9828.96
Engineering	Office Supplies	2023-04-30	9828.96
Engineering	Office Supplies	2023-05-31	9828.96
Engineering	Office Supplies	2023-06-30	10811.9
Engineering	Office Supplies	2023-07-31	10811.9
Engineering	Office Supplies	2023-08-31	9828.96
Engineering	Office Supplies	2023-09-30	9828.96
Engineering	Office Supplies	2023-10-31	9828.96
Engineering	Office Supplies	2023-11-30	11794.8
Engineering	Office Supplies	2023-12-31	11794.8
Engineering	Training	2023-01-31	8050.08
Engineering	Training	2023-02-28	8050.08
Engineering	Training	2023-03-31	8050.08
Engineering	Training	2023-04-30	8050.08
Engineering	Training	2023-05-31	8050.08
Engineering	Training	2023-06-30	8855.09
Engineering	Training	2023-07-31	8855.09
Engineering	Training	2023-08-31	8050.08
Engineering	Training	2023-09-30	8050.08
Engineering	Training	2023-10-31	8050.08
Engineering	Training	2023-11-30	9660.09
Engineering	Training	2023-12-31	9660.09
Engineering	Marketing	2023-01-31	5702.03
Engineering	Marketing	2023-02-28	5702.03
Engineering	Marketing	2023-03-31	5702.03
Engineering	Marketing	2023-04-30	5702.03
Engineering	Marketing	2023-05-31	5702.03
Engineering	Marketing	2023-06-30	6272.23
Engineering	Marketing	2023-07-31	6272.23
Engineering	Marketing	2023-08-31	5702.03
Engineering	Marketing	2023-09-30	5702.03
Engineering	Marketing	2023-10-31	5702.03
Engineering	Marketing	2023-11-30	6842.43
Engineering	Marketing	2023-12-31	6842.43
Engineering	Equipment	2023-01-31	13503.5
Engineering	Equipment	2023-02-28	13503.5
Engineering	Equipment	2023-03-31	13503.5
Engineering	Equipment	2023-04-30	13503.5
Engineering	Equipment	2023-05-31	13503.5
Engineering	Equipment	2023-06-30	14853.9
Engineering	Equipment	2023-07-31	14853.9
Engineering	Equipment	2023-08-31	13503.5
Engineering	Equipment	2023-09-30	13503.5
Engineering	Equipment	2023-10-31	13503.5
Engineering	Equipment	2023-11-30	16204.2
Engineering	Equipment	2023-12-31	16204.2
Sales	Salaries	2023-01-31	166780
Sales	Salaries	2023-02-28	166780
Sales	Salaries	2023-03-31	166780
Sales	Salaries	2023-04-30	166780
Sales	Salaries	2023-05-31	166780
Sales	Salaries	2023-06-30	183458
Sales	Salaries	2023-07-31	183458
Sales	Salaries	2023-08-31	166780
Sales	Salaries	2023-09-30	166780
Sales	Salaries	2023-10-31	166780
Sales	Salaries	2023-11-30	200136
Sales	Salaries	2023-12-31	200136
Sales	Software	2023-01-31	18279.3
Sales	Software	2023-02-28	18279.3
Sales	Software	2023-03-31	18279.3
Sales	Software	2023-04-30	18279.3
Sales	Software	2023-05-31	18279.3
Sales	Software	2023-06-30	20107.2
Sales	Software	2023-07-31	20107.2
Sales	Software	2023-08-31	18279.3
Sales	Software	2023-09-30	18279.3
Sales	Software	2023-10-31	18279.3
Sales	Software	2023-11-30	21935.1
Sales	Software	2023-12-31	21935.1
Sales	Travel	2023-01-31	3619.67
Sales	Travel	2023-02-28	3619.67
Sales	Travel	2023-03-31	3619.67
Sales	Travel	2023-04-30	3619.67
Sales	Travel	2023-05-31	3619.67
Sales	Travel	2023-06-30	3981.63
Sales	Travel	2023-07-31	3981.63
Sales	Travel	2023-08-31	3619.67
Sales	Travel	2023-09-30	3619.67
Sales	Travel	2023-10-31	3619.67
Sales	Travel	2023-11-30	4343.6
Sales	Travel	2023-12-31	4343.6
Sales	Office Supplies	2023-01-31	7056.64
Sales	Office Supplies	2023-02-28	7056.64
Sales	Office Supplies	2023-03-31	7056.64
Sales	Office Supplies	2023-04-30	7056.64
Sales	Office Supplies	2023-05-31	7056.64
Sales	Office Supplies	2023-06-30	7762.3
Sales	Office Supplies	2023-07-31	7762.3
Sales	Office Supplies	2023-08-31	7056.64
Sales	Office Supplies	2023-09-30	7056.64
Sales	Office Supplies	2023-10-31	7056.64
Sales	Office Supplies	2023-11-30	8467.97
Sales	Office Supplies	2023-12-31	8467.97
Sales	Training	2023-01-31	4579.09
Sales	Training	2023-02-28	4579.09
Sales	Training	2023-03-31	4579.09
Sales	Training	2023-04-30	4579.09
Sales	Training	2023-05-31	4579.09
Sales	Training	2023-06-30	5037
Sales	Training	2023-07-31	5037
Sales	Training	2023-08-31	4579.09
Sales	Training	2023-09-30	4579.09
Sales	Training	2023-10-31	4579.09
Sales	Training	2023-11-30	5494.91
Sales	Training	2023-12-31	5494.91
Sales	Marketing	2023-01-31	8850.7
Sales	Marketing	2023-02-28	8850.7
Sales	Marketing	2023-03-31	8850.7
Sales	Marketing	2023-04-30	8850.7
Sales	Marketing	2023-05-31	8850.7
Sales	Marketing	2023-06-30	9735.77
Sales	Marketing	2023-07-31	9735.77
Sales	Marketing	2023-08-31	8850.7
Sales	Marketing	2023-09-30	8850.7
Sales	Marketing	2023-10-31	8850.7
Sales	Marketing	2023-11-30	10620.8
Sales	Marketing	2023-12-31	10620.8
Sales	Equipment	2023-01-31	7413.08
Sales	Equipment	2023-02-28	7413.08
Sales	Equipment	2023-03-31	7413.08
Sales	Equipment	2023-04-30	7413.08
Sales	Equipment	2023-05-31	7413.08
Sales	Equipment	2023-06-30	8154.39
Sales	Equipment	2023-07-31	8154.39
Sales	Equipment	2023-08-31	7413.08
Sales	Equipment	2023-09-30	7413.08
Sales	Equipment	2023-10-31	7413.08
Sales	Equipment	2023-11-30	8895.7
Sales	Equipment	2023-12-31	8895.7
Marketing	Salaries	2023-01-31	128227
Marketing	Salaries	2023-02-28	128227
Marketing	Salaries	2023-03-31	128227
Marketing	Salaries	2023-04-30	128227
Marketing	Salaries	2023-05-31	128227
Marketing	Salaries	2023-06-30	141050
Marketing	Salaries	2023-07-31	141050
Marketing	Salaries	2023-08-31	128227
Marketing	Salaries	2023-09-30	128227
Marketing	Salaries	2023-10-31	128227
Marketing	Salaries	2023-11-30	153872
Marketing	Salaries	2023-12-31	153872
Marketing	Software	2023-01-31	6749.46
Marketing	Software	2023-02-28	6749.46
Marketing	Software	2023-03-31	6749.46
Marketing	Software	2023-04-30	6749.46
Marketing	Software	2023-05-31	6749.46
Marketing	Software	2023-06-30	7424.41
Marketing	Software	2023-07-31	7424.41
Marketing	Software	2023-08-31	6749.46
Marketing	Software	2023-09-30	6749.46
Marketing	Software	2023-10-31	6749.46
Marketing	Software	2023-11-30	8099.35
Marketing	Software	2023-12-31	8099.35
Marketing	Travel	2023-01-31	5578.31
Marketing	Travel	2023-02-28	5578.31
Marketing	Travel	2023-03-31	5578.31
Marketing	Travel	2023-04-30	5578.31
Marketing	Travel	2023-05-31	5578.31
Marketing	Travel	2023-06-30	6136.14
Marketing	Travel	2023-07-31	6136.14
Marketing	Travel	2023-08-31	5578.31
Marketing	Travel	2023-09-30	5578.31
Marketing	Travel	2023-10-31	5578.31
Marketing	Travel	2023-11-30	6693.98
Marketing	Travel	2023-12-31	6693.98
Marketing	Office Supplies	2023-01-31	7014.16
Marketing	Office Supplies	2023-02-28	7014.16
Marketing	Office Supplies	2023-03-31	7014.16
Marketing	Office Supplies	2023-04-30	7014.16
Marketing	Office Supplies	2023-05-31	7014.16
Marketing	Office Supplies	2023-06-30	7715.57
Marketing	Office Supplies	2023-07-31	7715.57
Marketing	Office Supplies	2023-08-31	7014.16
Marketing	Office Supplies	2023-09-30	7014.16
Marketing	Office Supplies	2023-10-31	7014.16
Marketing	Office Supplies	2023-11-30	8416.99
Marketing	Office Supplies	2023-12-31	8416.99
Marketing	Training	2023-01-31	6530.48
Marketing	Training	2023-02-28	6530.48
Marketing	Training	2023-03-31	6530.48
Marketing	Training	2023-04-30	6530.48
Marketing	Training	2023-05-31	6530.48
Marketing	Training	2023-06-30	7183.53
Marketing	Training	2023-07-31	7183.53
Marketing	Training	2023-08-31	6530.48
Marketing	Training	2023-09-30	6530.48
Marketing	Training	2023-10-31	6530.48
Marketing	Training	2023-11-30	7836.58
Marketing	Training	2023-12-31	7836.58
Marketing	Marketing	2023-01-31	6517.66
Marketing	Marketing	2023-02-28	6517.66
Marketing	Marketing	2023-03-31	6517.66
Marketing	Marketing	2023-04-30	6517.66
Marketing	Marketing	2023-05-31	6517.66
Marketing	Marketing	2023-06-30	7169.42
Marketing	Marketing	2023-07-31	7169.42
Marketing	Marketing	2023-08-31	6517.66
Marketing	Marketing	2023-09-30	6517.66
Marketing	Marketing	2023-10-31	6517.66
Marketing	Marketing	2023-11-30	7821.19
Marketing	Marketing	2023-12-31	7821.19
Marketing	Equipment	2023-01-31	10178.5
Marketing	Equipment	2023-02-28	10178.5
Marketing	Equipment	2023-03-31	10178.5
Marketing	Equipment	2023-04-30	10178.5
Marketing	Equipment	2023-05-31	10178.5
Marketing	Equipment	2023-06-30	11196.3
Marketing	Equipment	2023-07-31	11196.3
Marketing	Equipment	2023-08-31	10178.5
Marketing	Equipment	2023-09-30	10178.5
Marketing	Equipment	2023-10-31	10178.5
Marketing	Equipment	2023-11-30	12214.1
Marketing	Equipment	2023-12-31	12214.1
HR	Salaries	2023-01-31	142352
HR	Salaries	2023-02-28	142352
HR	Salaries	2023-03-31	142352
HR	Salaries	2023-04-30	142352
HR	Salaries	2023-05-31	142352
HR	Salaries	2023-06-30	156587
HR	Salaries	2023-07-31	156587
HR	Salaries	2023-08-31	142352
HR	Salaries	2023-09-30	142352
HR	Salaries	2023-10-31	142352
HR	Salaries	2023-11-30	170823
HR	Salaries	2023-12-31	170823
HR	Software	2023-01-31	10881
HR	Software	2023-02-28	10881
HR	Software	2023-03-31	10881
HR	Software	2023-04-30	10881
HR	Software	2023-05-31	10881
HR	Software	2023-06-30	11969.2
HR	Software	2023-07-31	11969.2
HR	Software	2023-08-31	10881
HR	Software	2023-09-30	10881
HR	Software	2023-10-31	10881
HR	Software	2023-11-30	13057.3
HR	Software	2023-12-31	13057.3
HR	Travel	2023-01-31	7505.11
HR	Travel	2023-02-28	7505.11
HR	Travel	2023-03-31	7505.11
HR	Travel	2023-04-30	7505.11
HR	Travel	2023-05-31	7505.11
HR	Travel	2023-06-30	8255.62
HR	Travel	2023-07-31	8255.62
HR	Travel	2023-08-31	7505.11
HR	Travel	2023-09-30	7505.11
HR	Travel	2023-10-31	7505.11
HR	Travel	2023-11-30	9006.13
HR	Travel	2023-12-31	9006.13
HR	Office Supplies	2023-01-31	5279.13
HR	Office Supplies	2023-02-28	5279.13
HR	Office Supplies	2023-03-31	5279.13
HR	Office Supplies	2023-04-30	5279.13
HR	Office Supplies	2023-05-31	5279.13
HR	Office Supplies	2023-06-30	5807.05
HR	Office Supplies	2023-07-31	5807.05
HR	Office Supplies	2023-08-31	5279.13
HR	Office Supplies	2023-09-30	5279.13
HR	Office Supplies	2023-10-31	5279.13
HR	Office Supplies	2023-11-30	6334.96
HR	Office Supplies	2023-12-31	6334.96
HR	Training	2023-01-31	5035.79
HR	Training	2023-02-28	5035.79
HR	Training	2023-03-31	5035.79
HR	Training	2023-04-30	5035.79
HR	Training	2023-05-31	5035.79
HR	Training	2023-06-30	5539.37
HR	Training	2023-07-31	5539.37
HR	Training	2023-08-31	5035.79
HR	Training	2023-09-30	5035.79
HR	Training	2023-10-31	5035.79
HR	Training	2023-11-30	6042.95
HR	Training	2023-12-31	6042.95
HR	Marketing	2023-01-31	3334.12
HR	Marketing	2023-02-28	3334.12
HR	Marketing	2023-03-31	3334.12
HR	Marketing	2023-04-30	3334.12
HR	Marketing	2023-05-31	3334.12
HR	Marketing	2023-06-30	3667.53
HR	Marketing	2023-07-31	3667.53
HR	Marketing	2023-08-31	3334.12
HR	Marketing	2023-09-30	3334.12
HR	Marketing	2023-10-31	3334.12
HR	Marketing	2023-11-30	4000.94
HR	Marketing	2023-12-31	4000.94
HR	Equipment	2023-01-31	10447.9
HR	Equipment	2023-02-28	10447.9
HR	Equipment	2023-03-31	10447.9
HR	Equipment	2023-04-30	10447.9
HR	Equipment	2023-05-31	10447.9
HR	Equipment	2023-06-30	11492.6
HR	Equipment	2023-07-31	11492.6
HR	Equipment	2023-08-31	10447.9
HR	Equipment	2023-09-30	10447.9
HR	Equipment	2023-10-31	10447.9
HR	Equipment	2023-11-30	12537.4
HR	Equipment	2023-12-31	12537.4
Operations	Salaries	2023-01-31	89840.9
Operations	Salaries	2023-02-28	89840.9
Operations	Salaries	2023-03-31	89840.9
Operations	Salaries	2023-04-30	89840.9
Operations	Salaries	2023-05-31	89840.9
Operations	Salaries	2023-06-30	98825
Operations	Salaries	2023-07-31	98825
Operations	Salaries	2023-08-31	89840.9
Operations	Salaries	2023-09-30	89840.9
Operations	Salaries	2023-10-31	89840.9
Operations	Salaries	2023-11-30	107809
Operations	Salaries	2023-12-31	107809
Operations	Software	2023-01-31	13696.9
Operations	Software	2023-02-28	13696.9
Operations	Software	2023-03-31	13696.9
Operations	Software	2023-04-30	13696.9
Operations	Software	2023-05-31	13696.9
Operations	Software	2023-06-30	15066.6
Operations	Software	2023-07-31	15066.6
Operations	Software	2023-08-31	13696.9
Operations	Software	2023-09-30	13696.9
Operations	Software	2023-10-31	13696.9
Operations	Software	2023-11-30	16436.3
Operations	Software	2023-12-31	16436.3
Operations	Travel	2023-01-31	6055.35
Operations	Travel	2023-02-28	6055.35
Operations	Travel	2023-03-31	6055.35
Operations	Travel	2023-04-30	6055.35
Operations	Travel	2023-05-31	6055.35
Operations	Travel	2023-06-30	6660.89
Operations	Travel	2023-07-31	6660.89
Operations	Travel	2023-08-31	6055.35
Operations	Travel	2023-09-30	6055.35
Operations	Travel	2023-10-31	6055.35
Operations	Travel	2023-11-30	7266.42
Operations	Travel	2023-12-31	7266.42
Operations	Office Supplies	2023-01-31	7961.81
Operations	Office Supplies	2023-02-28	7961.81
Operations	Office Supplies	2023-03-31	7961.81
Operations	Office Supplies	2023-04-30	7961.81
Operations	Office Supplies	2023-05-31	7961.81
Operations	Office Supplies	2023-06-30	8757.99
Operations	Office Supplies	2023-07-31	8757.99
Operations	Office Supplies	2023-08-31	7961.81
Operations	Office Supplies	2023-09-30	7961.81
Operations	Office Supplies	2023-10-31	7961.81
Operations	Office Supplies	2023-11-30	9554.18
Operations	Office Supplies	2023-12-31	9554.18
Operations	Training	2023-01-31	2552.58
Operations	Training	2023-02-28	2552.58
Operations	Training	2023-03-31	2552.58
Operations	Training	2023-04-30	2552.58
Operations	Training	2023-05-31	2552.58
Operations	Training	2023-06-30	2807.84
Operations	Training	2023-07-31	2807.84
Operations	Training	2023-08-31	2552.58
Operations	Training	2023-09-30	2552.58
Operations	Training	2023-10-31	2552.58
Operations	Training	2023-11-30	3063.1
Operations	Training	2023-12-31	3063.1
Operations	Marketing	2023-01-31	3444.04
Operations	Marketing	2023-02-28	3444.04
Operations	Marketing	2023-03-31	3444.04
Operations	Marketing	2023-04-30	3444.04
Operations	Marketing	2023-05-31	3444.04
Operations	Marketing	2023-06-30	3788.44
Operations	Marketing	2023-07-31	3788.44
Operations	Marketing	2023-08-31	3444.04
Operations	Marketing	2023-09-30	3444.04
Operations	Marketing	2023-10-31	3444.04
Operations	Marketing	2023-11-30	4132.84
Operations	Marketing	2023-12-31	4132.84
Operations	Equipment	2023-01-31	13771.6
Operations	Equipment	2023-02-28	13771.6
Operations	Equipment	2023-03-31	13771.6
Operations	Equipment	2023-04-30	13771.6
Operations	Equipment	2023-05-31	13771.6
Operations	Equipment	2023-06-30	15148.7
Operations	Equipment	2023-07-31	15148.7
Operations	Equipment	2023-08-31	13771.6
Operations	Equipment	2023-09-30	13771.6
Operations	Equipment	2023-10-31	13771.6
Operations	Equipment	2023-11-30	16525.9
Operations	Equipment	2023-12-31	16525.9
