# Supplementary material
Source: ML conference proceedings conference paper supplement (https://openreview.net/forum?id=xggSxCFQbA)
Supplement: supplementary_material [file contracts_draft.docx]

CONFIDENTIAL - INTERNAL DRAFT

Subject: Strategic Partnership Agreements

Notes:
- Terms and Conditions not finalized
- Sensitive financial models included
- Do not distribute externally
- Legal review pending
