# Supplementary material
Source: ML conference proceedings conference paper supplement (https://openreview.net/forum?id=xggSxCFQbA)
Supplement: supplementary_material [file invoices.xlsx]

## Sheet: Sheet1
Invoice_ID	Customer	Invoice_Date	Amount	Due_Date
INV0000	Customer_001	2023-01-01	4617.57	2023-01-31
INV0001	Customer_034	2023-01-02	8611.7	2023-02-01
INV0002	Customer_068	2023-01-03	4116.39	2023-02-02
INV0003	Customer_088	2023-01-04	6891.59	2023-02-03
INV0004	Customer_021	2023-01-05	7383.83	2023-02-04
INV0005	Customer_033	2023-01-06	6275.64	2023-02-05
INV0006	Customer_007	2023-01-07	4215.18	2023-02-06
INV0007	Customer_065	2023-01-08	6193.48	2023-02-07
INV0008	Customer_003	2023-01-09	4080.39	2023-02-08
INV0009	Customer_051	2023-01-10	1754.86	2023-02-09
INV0010	Customer_079	2023-01-11	9935.24	2023-02-10
INV0011	Customer_095	2023-01-12	2144.64	2023-02-11
INV0012	Customer_054	2023-01-13	1651.14	2023-02-12
INV0013	Customer_080	2023-01-14	8906.78	2023-02-13
INV0014	Customer_074	2023-01-15	3716.51	2023-02-14
INV0015	Customer_093	2023-01-16	6852.67	2023-02-15
INV0016	Customer_059	2023-01-17	3961.05	2023-02-16
INV0017	Customer_006	2023-01-18	4523.09	2023-02-17
INV0018	Customer_029	2023-01-19	3359.02	2023-02-18
INV0019	Customer_017	2023-01-20	4087.4	2023-02-19
INV0020	Customer_060	2023-01-21	4696.3	2023-02-20
INV0021	Customer_022	2023-01-22	7483.74	2023-02-21
INV0022	Customer_024	2023-01-23	5603.83	2023-02-22
INV0023	Customer_081	2023-01-24	9492.09	2023-02-23
INV0024	Customer_085	2023-01-25	1376.92	2023-02-24
INV0025	Customer_051	2023-01-26	5527.61	2023-02-25
INV0026	Customer_050	2023-01-27	6258.02	2023-02-26
INV0027	Customer_011	2023-01-28	9281.77	2023-02-27
INV0028	Customer_056	2023-01-29	1442.43	2023-02-28
INV0029	Customer_071	2023-01-30	6161.5	2023-03-01
INV0030	Customer_042	2023-01-31	8682.67	2023-03-02
INV0031	Customer_039	2023-02-01	3177.35	2023-03-03
INV0032	Customer_069	2023-02-02	8886.63	2023-03-04
INV0033	Customer_048	2023-02-03	1171.39	2023-03-05
INV0034	Customer_057	2023-02-04	7592.09	2023-03-06
INV0035	Customer_021	2023-02-05	9398.02	2023-03-07
INV0036	Customer_082	2023-02-06	6914.78	2023-03-08
INV0037	Customer_099	2023-02-07	4951.26	2023-03-09
INV0038	Customer_020	2023-02-08	1403.93	2023-03-10
INV0039	Customer_015	2023-02-09	9281.02	2023-03-11
INV0040	Customer_069	2023-02-10	5232.67	2023-03-12
INV0041	Customer_077	2023-02-11	1260.97	2023-03-13
INV0042	Customer_051	2023-02-12	7208.39	2023-03-14
INV0043	Customer_076	2023-02-13	5336.54	2023-03-15
INV0044	Customer_062	2023-02-14	2119.11	2023-03-16
INV0045	Customer_085	2023-02-15	2928.45	2023-03-17
INV0046	Customer_037	2023-02-16	1580.42	2023-03-18
INV0047	Customer_006	2023-02-17	6168.64	2023-03-19
INV0048	Customer_071	2023-02-18	6598.27	2023-03-20
INV0049	Customer_026	2023-02-19	5551.68	2023-03-21
INV0050	Customer_008	2023-02-20	8353.92	2023-03-22
INV0051	Customer_073	2023-02-21	8749.08	2023-03-23
INV0052	Customer_091	2023-02-22	6540.62	2023-03-24
INV0053	Customer_004	2023-02-23	1114.81	2023-03-25
INV0054	Customer_021	2023-02-24	7257.07	2023-03-26
INV0055	Customer_031	2023-02-25	4761.99	2023-03-27
INV0056	Customer_021	2023-02-26	6090.02	2023-03-28
INV0057	Customer_025	2023-02-27	6841.73	2023-03-29
INV0058	Customer_015	2023-02-28	4152.13	2023-03-30
INV0059	Customer_035	2023-03-01	9253.89	2023-03-31
INV0060	Customer_049	2023-03-02	2205.77	2023-04-01
INV0061	Customer_043	2023-03-03	7043.61	2023-04-02
INV0062	Customer_041	2023-03-04	1039.24	2023-04-03
INV0063	Customer_037	2023-03-05	9321.86	2023-04-04
INV0064	Customer_057	2023-03-06	2012.54	2023-04-05
INV0065	Customer_042	2023-03-07	1853.96	2023-04-06
INV0066	Customer_047	2023-03-08	3997.07	2023-04-07
INV0067	Customer_092	2023-03-09	4362.1	2023-04-08
INV0068	Customer_061	2023-03-10	2928.7	2023-04-09
INV0069	Customer_014	2023-03-11	6266.09	2023-04-10
INV0070	Customer_068	2023-03-12	4986.23	2023-04-11
INV0071	Customer_053	2023-03-13	1307.58	2023-04-12
INV0072	Customer_084	2023-03-14	3876.87	2023-04-13
INV0073	Customer_034	2023-03-15	8293.9	2023-04-14
INV0074	Customer_076	2023-03-16	7207.31	2023-04-15
INV0075	Customer_097	2023-03-17	7523.84	2023-04-16
INV0076	Customer_024	2023-03-18	7283.05	2023-04-17
INV0077	Customer_020	2023-03-19	3798.76	2023-04-18
INV0078	Customer_069	2023-03-20	1896.98	2023-04-19
INV0079	Customer_030	2023-03-21	3452.2	2023-04-20
INV0080	Customer_088	2023-03-22	8486.07	2023-04-21
INV0081	Customer_007	2023-03-23	9824.24	2023-04-22
INV0082	Customer_036	2023-03-24	5444.62	2023-04-23
INV0083	Customer_038	2023-03-25	1087.3	2023-04-24
INV0084	Customer_080	2023-03-26	2260.4	2023-04-25
INV0085	Customer_052	2023-03-27	3898.73	2023-04-26
INV0086	Customer_015	2023-03-28	6207.27	2023-04-27
INV0087	Customer_046	2023-03-29	1675.84	2023-04-28
INV0088	Customer_023	2023-03-30	9490.22	2023-04-29
INV0089	Customer_012	2023-03-31	4285.75	2023-04-30
INV0090	Customer_093	2023-04-01	9213.26	2023-05-01
INV0091	Customer_044	2023-04-02	8024.7	2023-05-02
INV0092	Customer_015	2023-04-03	7798.94	2023-05-03
INV0093	Customer_093	2023-04-04	6460.48	2023-05-04
INV0094	Customer_049	2023-04-05	6641.05	2023-05-05
INV0095	Customer_021	2023-04-06	6742.03	2023-05-06
INV0096	Customer_015	2023-04-07	6658.49	2023-05-07
INV0097	Customer_014	2023-04-08	5983.55	2023-05-08
INV0098	Customer_042	2023-04-09	9877.73	2023-05-09
INV0099	Customer_080	2023-04-10	7590.62	2023-05-10
INV0100	Customer_015	2023-04-11	7992.52	2023-05-11
INV0101	Customer_063	2023-04-12	8852.17	2023-05-12
INV0102	Customer_068	2023-04-13	2940.76	2023-05-13
INV0103	Customer_027	2023-04-14	1754.24	2023-05-14
INV0104	Customer_087	2023-04-15	5346.05	2023-05-15
INV0105	Customer_093	2023-04-16	5626.73	2023-05-16
INV0106	Customer_053	2023-04-17	8462.64	2023-05-17
INV0107	Customer_052	2023-04-18	4994.05	2023-05-18
INV0108	Customer_063	2023-04-19	6137.68	2023-05-19
INV0109	Customer_073	2023-04-20	5743.64	2023-05-20
INV0110	Customer_053	2023-04-21	1343.83	2023-05-21
INV0111	Customer_057	2023-04-22	6536.93	2023-05-22
INV0112	Customer_052	2023-04-23	8452.39	2023-05-23
INV0113	Customer_043	2023-04-24	2417.5	2023-05-24
INV0114	Customer_007	2023-04-25	6348.99	2023-05-25
INV0115	Customer_042	2023-04-26	6342.49	2023-05-26
INV0116	Customer_004	2023-04-27	2477.66	2023-05-27
INV0117	Customer_069	2023-04-28	2111.17	2023-05-28
INV0118	Customer_005	2023-04-29	9820.47	2023-05-29
INV0119	Customer_075	2023-04-30	4543.47	2023-05-30
INV0120	Customer_092	2023-05-01	3046.8	2023-05-31
INV0121	Customer_080	2023-05-02	2541.92	2023-06-01
INV0122	Customer_041	2023-05-03	7008.42	2023-06-02
INV0123	Customer_094	2023-05-04	6485.01	2023-06-03
INV0124	Customer_004	2023-05-05	6791.97	2023-06-04
INV0125	Customer_002	2023-05-06	1792.05	2023-06-05
INV0126	Customer_067	2023-05-07	9041.81	2023-06-06
INV0127	Customer_021	2023-05-08	4503.4	2023-06-07
INV0128	Customer_070	2023-05-09	3820.32	2023-06-08
INV0129	Customer_043	2023-05-10	5161.25	2023-06-09
INV0130	Customer_082	2023-05-11	4510.59	2023-06-10
INV0131	Customer_069	2023-05-12	8772.19	2023-06-11
INV0132	Customer_009	2023-05-13	9363.35	2023-06-12
INV0133	Customer_084	2023-05-14	3731.08	2023-06-13
INV0134	Customer_028	2023-05-15	8775.42	2023-06-14
INV0135	Customer_026	2023-05-16	8033.71	2023-06-15
INV0136	Customer_082	2023-05-17	9377.27	2023-06-16
INV0137	Customer_083	2023-05-18	3211.75	2023-06-17
INV0138	Customer_003	2023-05-19	6192.63	2023-06-18
INV0139	Customer_073	2023-05-20	3470.9	2023-06-19
INV0140	Customer_100	2023-05-21	8416.85	2023-06-20
INV0141	Customer_095	2023-05-22	1047.92	2023-06-21
INV0142	Customer_049	2023-05-23	6083.37	2023-06-22
INV0143	Customer_017	2023-05-24	4052.83	2023-06-23
INV0144	Customer_063	2023-05-25	3904.15	2023-06-24
INV0145	Customer_055	2023-05-26	6804.16	2023-06-25
INV0146	Customer_023	2023-05-27	8663.36	2023-06-26
INV0147	Customer_034	2023-05-28	6482.76	2023-06-27
INV0148	Customer_069	2023-05-29	8678.56	2023-06-28
INV0149	Customer_015	2023-05-30	3381.37	2023-06-29
INV0150	Customer_047	2023-05-31	5675.52	2023-06-30
INV0151	Customer_003	2023-06-01	5054.83	2023-07-01
INV0152	Customer_083	2023-06-02	1104.8	2023-07-02
INV0153	Customer_028	2023-06-03	6011.31	2023-07-03
INV0154	Customer_003	2023-06-04	6953.72	2023-07-04
INV0155	Customer_004	2023-06-05	6327.23	2023-07-05
INV0156	Customer_088	2023-06-06	7626.52	2023-07-06
INV0157	Customer_031	2023-06-07	6142.06	2023-07-07
INV0158	Customer_045	2023-06-08	1600.75	2023-07-08
INV0159	Customer_059	2023-06-09	2048.01	2023-07-09
INV0160	Customer_045	2023-06-10	6368.27	2023-07-10
INV0161	Customer_075	2023-06-11	3474.81	2023-07-11
INV0162	Customer_037	2023-06-12	1716.81	2023-07-12
INV0163	Customer_065	2023-06-13	4866.42	2023-07-13
INV0164	Customer_009	2023-06-14	5988.9	2023-07-14
INV0165	Customer_017	2023-06-15	3958.71	2023-07-15
INV0166	Customer_065	2023-06-16	7483.9	2023-07-16
INV0167	Customer_003	2023-06-17	6793.94	2023-07-17
INV0168	Customer_026	2023-06-18	3995.37	2023-07-18
INV0169	Customer_053	2023-06-19	7793.85	2023-07-19
INV0170	Customer_031	2023-06-20	6838.26	2023-07-20
INV0171	Customer_026	2023-06-21	6737.01	2023-07-21
INV0172	Customer_023	2023-06-22	5980.85	2023-07-22
INV0173	Customer_030	2023-06-23	1102.51	2023-07-23
INV0174	Customer_010	2023-06-24	7268.56	2023-07-24
INV0175	Customer_072	2023-06-25	4384.38	2023-07-25
INV0176	Customer_089	2023-06-26	9483.49	2023-07-26
INV0177	Customer_064	2023-06-27	8361.86	2023-07-27
INV0178	Customer_022	2023-06-28	6289.25	2023-07-28
INV0179	Customer_015	2023-06-29	3269.64	2023-07-29
INV0180	Customer_056	2023-06-30	2833.46	2023-07-30
INV0181	Customer_074	2023-07-01	4063.46	2023-07-31
INV0182	Customer_020	2023-07-02	5289.11	2023-08-01
INV0183	Customer_047	2023-07-03	3664.59	2023-08-02
INV0184	Customer_087	2023-07-04	5634.37	2023-08-03
INV0185	Customer_053	2023-07-05	2488.33	2023-08-04
INV0186	Customer_053	2023-07-06	9799.42	2023-08-05
INV0187	Customer_001	2023-07-07	1971.32	2023-08-06
INV0188	Customer_002	2023-07-08	9387.5	2023-08-07
INV0189	Customer_058	2023-07-09	9222.2	2023-08-08
INV0190	Customer_019	2023-07-10	5728.24	2023-08-09
INV0191	Customer_062	2023-07-11	7524.19	2023-08-10
INV0192	Customer_078	2023-07-12	4924.43	2023-08-11
INV0193	Customer_072	2023-07-13	6670.31	2023-08-12
INV0194	Customer_012	2023-07-14	4065.18	2023-08-13
INV0195	Customer_026	2023-07-15	3710.43	2023-08-14
INV0196	Customer_027	2023-07-16	6204.07	2023-08-15
INV0197	Customer_029	2023-07-17	5483.17	2023-08-16
INV0198	Customer_015	2023-07-18	6215.83	2023-08-17
INV0199	Customer_046	2023-07-19	3579.95	2023-08-18
INV0200	Customer_001	2023-07-20	4302.62	2023-08-19
INV0201	Customer_060	2023-07-21	1755.08	2023-08-20
INV0202	Customer_092	2023-07-22	1470.49	2023-08-21
INV0203	Customer_057	2023-07-23	3281.11	2023-08-22
INV0204	Customer_003	2023-07-24	1668.22	2023-08-23
INV0205	Customer_018	2023-07-25	1933.97	2023-08-24
INV0206	Customer_052	2023-07-26	8316.36	2023-08-25
INV0207	Customer_060	2023-07-27	1349.86	2023-08-26
INV0208	Customer_034	2023-07-28	6930.49	2023-08-27
INV0209	Customer_096	2023-07-29	3453.02	2023-08-28
INV0210	Customer_093	2023-07-30	8843.91	2023-08-29
INV0211	Customer_089	2023-07-31	5364.93	2023-08-30
INV0212	Customer_060	2023-08-01	3750.19	2023-08-31
INV0213	Customer_026	2023-08-02	5658.75	2023-09-01
INV0214	Customer_072	2023-08-03	4437.62	2023-09-02
INV0215	Customer_019	2023-08-04	6078.71	2023-09-03
INV0216	Customer_022	2023-08-05	2030.8	2023-09-04
INV0217	Customer_093	2023-08-06	9972.91	2023-09-05
INV0218	Customer_033	2023-08-07	4830	2023-09-06
INV0219	Customer_038	2023-08-08	4134.08	2023-09-07
INV0220	Customer_035	2023-08-09	7391.89	2023-09-08
INV0221	Customer_067	2023-08-10	4275.09	2023-09-09
INV0222	Customer_083	2023-08-11	8499.47	2023-09-10
INV0223	Customer_010	2023-08-12	5088.44	2023-09-11
INV0224	Customer_091	2023-08-13	7476.03	2023-09-12
INV0225	Customer_015	2023-08-14	1967.08	2023-09-13
INV0226	Customer_011	2023-08-15	8615.07	2023-09-14
INV0227	Customer_090	2023-08-16	7621.46	2023-09-15
INV0228	Customer_024	2023-08-17	2905.45	2023-09-16
INV0229	Customer_077	2023-08-18	2307.57	2023-09-17
INV0230	Customer_096	2023-08-19	3846.63	2023-09-18
INV0231	Customer_004	2023-08-20	9784.64	2023-09-19
INV0232	Customer_013	2023-08-21	3311.48	2023-09-20
INV0233	Customer_073	2023-08-22	5105.14	2023-09-21
INV0234	Customer_057	2023-08-23	1270.18	2023-09-22
INV0235	Customer_098	2023-08-24	4575.05	2023-09-23
INV0236	Customer_037	2023-08-25	6141.88	2023-09-24
INV0237	Customer_048	2023-08-26	9578.12	2023-09-25
INV0238	Customer_071	2023-08-27	5650.62	2023-09-26
INV0239	Customer_001	2023-08-28	8371.97	2023-09-27
INV0240	Customer_060	2023-08-29	5924.15	2023-09-28
INV0241	Customer_012	2023-08-30	1367.07	2023-09-29
INV0242	Customer_021	2023-08-31	3835.07	2023-09-30
INV0243	Customer_011	2023-09-01	6179.95	2023-10-01
INV0244	Customer_044	2023-09-02	9555.35	2023-10-02
INV0245	Customer_058	2023-09-03	8732.17	2023-10-03
INV0246	Customer_044	2023-09-04	3055.2	2023-10-04
INV0247	Customer_078	2023-09-05	2980.99	2023-10-05
INV0248	Customer_098	2023-09-06	2810.56	2023-10-06
INV0249	Customer_034	2023-09-07	9302.49	2023-10-07
INV0250	Customer_025	2023-09-08	8674	2023-10-08
INV0251	Customer_004	2023-09-09	7973.95	2023-10-09
INV0252	Customer_064	2023-09-10	4534.62	2023-10-10
INV0253	Customer_090	2023-09-11	5539.43	2023-10-11
INV0254	Customer_016	2023-09-12	5178.99	2023-10-12
INV0255	Customer_010	2023-09-13	3280.58	2023-10-13
INV0256	Customer_066	2023-09-14	5545.25	2023-10-14
INV0257	Customer_035	2023-09-15	1274.47	2023-10-15
INV0258	Customer_083	2023-09-16	2186.29	2023-10-16
INV0259	Customer_006	2023-09-17	8979.31	2023-10-17
INV0260	Customer_019	2023-09-18	7765.12	2023-10-18
INV0261	Customer_059	2023-09-19	4805.82	2023-10-19
INV0262	Customer_053	2023-09-20	5654.35	2023-10-20
INV0263	Customer_008	2023-09-21	4329.99	2023-10-21
INV0264	Customer_078	2023-09-22	7667.02	2023-10-22
INV0265	Customer_010	2023-09-23	8057.68	2023-10-23
INV0266	Customer_067	2023-09-24	7869.57	2023-10-24
INV0267	Customer_038	2023-09-25	7503.51	2023-10-25
INV0268	Customer_029	2023-09-26	2840.54	2023-10-26
INV0269	Customer_015	2023-09-27	4041.73	2023-10-27
INV0270	Customer_087	2023-09-28	5228.61	2023-10-28
INV0271	Customer_023	2023-09-29	3977.14	2023-10-29
INV0272	Customer_082	2023-09-30	7794.46	2023-10-30
INV0273	Customer_046	2023-10-01	3964.18	2023-10-31
INV0274	Customer_083	2023-10-02	2244.09	2023-11-01
INV0275	Customer_028	2023-10-03	4591.36	2023-11-02
INV0276	Customer_026	2023-10-04	9819.23	2023-11-03
INV0277	Customer_010	2023-10-05	3032.93	2023-11-04
INV0278	Customer_047	2023-10-06	6509.43	2023-11-05
INV0279	Customer_004	2023-10-07	4896.76	2023-11-06
INV0280	Customer_055	2023-10-08	1639.22	2023-11-07
INV0281	Customer_066	2023-10-09	5390.89	2023-11-08
INV0282	Customer_067	2023-10-10	7319.48	2023-11-09
INV0283	Customer_007	2023-10-11	5618.98	2023-11-10
INV0284	Customer_055	2023-10-12	8848.95	2023-11-11
INV0285	Customer_080	2023-10-13	3600.43	2023-11-12
INV0286	Customer_031	2023-10-14	1776.24	2023-11-13
INV0287	Customer_074	2023-10-15	9429.09	2023-11-14
INV0288	Customer_019	2023-10-16	4403.77	2023-11-15
INV0289	Customer_028	2023-10-17	6187.65	2023-11-16
INV0290	Customer_081	2023-10-18	8128.03	2023-11-17
INV0291	Customer_028	2023-10-19	3918.82	2023-11-18
INV0292	Customer_019	2023-10-20	7445.48	2023-11-19
INV0293	Customer_087	2023-10-21	2218.77	2023-11-20
INV0294	Customer_020	2023-10-22	3621.64	2023-11-21
INV0295	Customer_013	2023-10-23	2302.4	2023-11-22
INV0296	Customer_077	2023-10-24	8301.08	2023-11-23
INV0297	Customer_043	2023-10-25	3003.84	2023-11-24
INV0298	Customer_011	2023-10-26	7456.63	2023-11-25
INV0299	Customer_048	2023-10-27	9489.69	2023-11-26
INV0300	Customer_015	2023-10-28	5749.95	2023-11-27
INV0301	Customer_017	2023-10-29	5860.26	2023-11-28
INV0302	Customer_054	2023-10-30	5149.3	2023-11-29
INV0303	Customer_050	2023-10-31	3933.01	2023-11-30
INV0304	Customer_028	2023-11-01	5280.9	2023-12-01
INV0305	Customer_083	2023-11-02	6425.27	2023-12-02
INV0306	Customer_004	2023-11-03	9873.92	2023-12-03
INV0307	Customer_022	2023-11-04	9439.88	2023-12-04
INV0308	Customer_086	2023-11-05	8759.38	2023-12-05
INV0309	Customer_039	2023-11-06	9002.17	2023-12-06
INV0310	Customer_034	2023-11-07	5210.64	2023-12-07
INV0311	Customer_097	2023-11-08	6917	2023-12-08
INV0312	Customer_044	2023-11-09	9055.6	2023-12-09
INV0313	Customer_042	2023-11-10	4536.56	2023-12-10
INV0314	Customer_040	2023-11-11	9655.86	2023-12-11
INV0315	Customer_097	2023-11-12	4742.07	2023-12-12
INV0316	Customer_012	2023-11-13	6409.74	2023-12-13
INV0317	Customer_002	2023-11-14	7388.24	2023-12-14
INV0318	Customer_028	2023-11-15	9555.33	2023-12-15
INV0319	Customer_074	2023-11-16	3201.55	2023-12-16
INV0320	Customer_086	2023-11-17	7715.18	2023-12-17
INV0321	Customer_081	2023-11-18	5687.34	2023-12-18
INV0322	Customer_090	2023-11-19	3417.01	2023-12-19
INV0323	Customer_067	2023-11-20	7989.46	2023-12-20
INV0324	Customer_071	2023-11-21	5970	2023-12-21
INV0325	Customer_072	2023-11-22	6948.76	2023-12-22
INV0326	Customer_084	2023-11-23	3906.11	2023-12-23
INV0327	Customer_076	2023-11-24	5331.47	2023-12-24
INV0328	Customer_099	2023-11-25	6556.19	2023-12-25
INV0329	Customer_081	2023-11-26	4644.2	2023-12-26
INV0330	Customer_092	2023-11-27	2785.35	2023-12-27
INV0331	Customer_010	2023-11-28	9654.76	2023-12-28
INV0332	Customer_086	2023-11-29	5603.21	2023-12-29
INV0333	Customer_057	2023-11-30	7605.28	2023-12-30
INV0334	Customer_097	2023-12-01	4699.42	2023-12-31
INV0335	Customer_086	2023-12-02	4196.19	2024-01-01
INV0336	Customer_037	2023-12-03	4664.48	2024-01-02
INV0337	Customer_077	2023-12-04	4682.77	2024-01-03
INV0338	Customer_091	2023-12-05	5897.62	2024-01-04
INV0339	Customer_064	2023-12-06	5891.23	2024-01-05
INV0340	Customer_079	2023-12-07	5474.38	2024-01-06
INV0341	Customer_086	2023-12-08	2213.07	2024-01-07
INV0342	Customer_094	2023-12-09	5464.68	2024-01-08
INV0343	Customer_040	2023-12-10	2521.94	2024-01-09
INV0344	Customer_098	2023-12-11	2135.22	2024-01-10
INV0345	Customer_060	2023-12-12	9393.81	2024-01-11
INV0346	Customer_098	2023-12-13	6444.55	2024-01-12
INV0347	Customer_048	2023-12-14	6935.41	2024-01-13
INV0348	Customer_099	2023-12-15	4616.14	2024-01-14
INV0349	Customer_019	2023-12-16	9180.83	2024-01-15
INV0350	Customer_072	2023-12-17	6741.37	2024-01-16
INV0351	Customer_033	2023-12-18	7922.53	2024-01-17
INV0352	Customer_044	2023-12-19	4317.06	2024-01-18
INV0353	Customer_092	2023-12-20	9640.11	2024-01-19
INV0354	Customer_037	2023-12-21	8384.15	2024-01-20
INV0355	Customer_089	2023-12-22	8685.54	2024-01-21
INV0356	Customer_036	2023-12-23	2549.75	2024-01-22
INV0357	Customer_081	2023-12-24	3438.67	2024-01-23
INV0358	Customer_088	2023-12-25	3570.64	2024-01-24
INV0359	Customer_021	2023-12-26	3438.18	2024-01-25
INV0360	Customer_002	2023-12-27	8698.67	2024-01-26
INV0361	Customer_031	2023-12-28	1286.96	2024-01-27
INV0362	Customer_097	2023-12-29	1684.9	2024-01-28
INV0363	Customer_030	2023-12-30	3465.23	2024-01-29
INV0364	Customer_076	2023-12-31	2798.86	2024-01-30
INV0365	Customer_044	2024-01-01	3086.74	2024-01-31
INV0366	Customer_012	2024-01-02	8181.49	2024-02-01
INV0367	Customer_051	2024-01-03	6068.14	2024-02-02
INV0368	Customer_049	2024-01-04	1051.94	2024-02-03
INV0369	Customer_024	2024-01-05	4863.9	2024-02-04
INV0370	Customer_024	2024-01-06	4670.96	2024-02-05
INV0371	Customer_060	2024-01-07	2025.51	2024-02-06
INV0372	Customer_011	2024-01-08	7085.28	2024-02-07
INV0373	Customer_013	2024-01-09	7318.87	2024-02-08
INV0374	Customer_091	2024-01-10	7488.04	2024-02-09
INV0375	Customer_072	2024-01-11	7556.24	2024-02-10
INV0376	Customer_074	2024-01-12	1000.48	2024-02-11
INV0377	Customer_072	2024-01-13	9585.29	2024-02-12
INV0378	Customer_064	2024-01-14	8327.88	2024-02-13
INV0379	Customer_020	2024-01-15	9135.84	2024-02-14
INV0380	Customer_072	2024-01-16	1140.79	2024-02-15
INV0381	Customer_073	2024-01-17	9404.73	2024-02-16
INV0382	Customer_071	2024-01-18	8288.1	2024-02-17
INV0383	Customer_078	2024-01-19	8534.97	2024-02-18
INV0384	Customer_028	2024-01-20	1839.59	2024-02-19
INV0385	Customer_002	2024-01-21	7649	2024-02-20
INV0386	Customer_043	2024-01-22	9639.25	2024-02-21
INV0387	Customer_008	2024-01-23	7106.93	2024-02-22
INV0388	Customer_013	2024-01-24	6135.05	2024-02-23
INV0389	Customer_085	2024-01-25	9510.67	2024-02-24
INV0390	Customer_092	2024-01-26	4986.43	2024-02-25
INV0391	Customer_035	2024-01-27	6393.64	2024-02-26
INV0392	Customer_023	2024-01-28	5287.04	2024-02-27
INV0393	Customer_046	2024-01-29	9395.62	2024-02-28
INV0394	Customer_015	2024-01-30	1684.76	2024-02-29
INV0395	Customer_002	2024-01-31	5510.08	2024-03-01
INV0396	Customer_061	2024-02-01	7182.57	2024-03-02
INV0397	Customer_076	2024-02-02	8127.16	2024-03-03
INV0398	Customer_064	2024-02-03	6247.17	2024-03-04
INV0399	Customer_052	2024-02-04	9180.26	2024-03-05
INV0400	Customer_036	2024-02-05	9477.92	2024-03-06
INV0401	Customer_067	2024-02-06	1578.87	2024-03-07
INV0402	Customer_069	2024-02-07	4621.33	2024-03-08
INV0403	Customer_067	2024-02-08	1211.13	2024-03-09
INV0404	Customer_047	2024-02-09	3964.75	2024-03-10
INV0405	Customer_083	2024-02-10	5831.81	2024-03-11
INV0406	Customer_002	2024-02-11	9197.15	2024-03-12
INV0407	Customer_044	2024-02-12	8618.99	2024-03-13
INV0408	Customer_064	2024-02-13	2147.5	2024-03-14
INV0409	Customer_081	2024-02-14	1837.27	2024-03-15
INV0410	Customer_078	2024-02-15	6303.41	2024-03-16
INV0411	Customer_028	2024-02-16	5789.06	2024-03-17
INV0412	Customer_091	2024-02-17	3397.4	2024-03-18
INV0413	Customer_054	2024-02-18	9095.08	2024-03-19
INV0414	Customer_074	2024-02-19	9346.3	2024-03-20
INV0415	Customer_067	2024-02-20	4623.5	2024-03-21
INV0416	Customer_036	2024-02-21	9012.72	2024-03-22
INV0417	Customer_063	2024-02-22	4455.54	2024-03-23
INV0418	Customer_025	2024-02-23	7631.35	2024-03-24
INV0419	Customer_086	2024-02-24	5283.48	2024-03-25
INV0420	Customer_048	2024-02-25	2103.25	2024-03-26
INV0421	Customer_039	2024-02-26	9351.41	2024-03-27
INV0422	Customer_047	2024-02-27	5086.87	2024-03-28
INV0423	Customer_094	2024-02-28	7610.38	2024-03-29
INV0424	Customer_021	2024-02-29	4304.56	2024-03-30
INV0425	Customer_030	2024-03-01	1169.93	2024-03-31
INV0426	Customer_092	2024-03-02	1904.77	2024-04-01
INV0427	Customer_031	2024-03-03	5465.98	2024-04-02
INV0428	Customer_026	2024-03-04	7209.68	2024-04-03
INV0429	Customer_022	2024-03-05	4012.62	2024-04-04
INV0430	Customer_021	2024-03-06	7259.4	2024-04-05
INV0431	Customer_001	2024-03-07	7287.72	2024-04-06
INV0432	Customer_037	2024-03-08	7335.42	2024-04-07
INV0433	Customer_077	2024-03-09	5432.7	2024-04-08
INV0434	Customer_085	2024-03-10	9233.98	2024-04-09
INV0435	Customer_046	2024-03-11	5402.77	2024-04-10
INV0436	Customer_009	2024-03-12	5052.39	2024-04-11
INV0437	Customer_017	2024-03-13	2794.43	2024-04-12
INV0438	Customer_047	2024-03-14	3768.9	2024-04-13
INV0439	Customer_085	2024-03-15	1381.01	2024-04-14
INV0440	Customer_095	2024-03-16	6701.82	2024-04-15
INV0441	Customer_059	2024-03-17	3236.82	2024-04-16
INV0442	Customer_054	2024-03-18	3737.4	2024-04-17
INV0443	Customer_086	2024-03-19	7937.33	2024-04-18
INV0444	Customer_012	2024-03-20	3944.99	2024-04-19
INV0445	Customer_064	2024-03-21	3179.76	2024-04-20
INV0446	Customer_006	2024-03-22	2521.52	2024-04-21
INV0447	Customer_053	2024-03-23	7973.73	2024-04-22
INV0448	Customer_016	2024-03-24	2167.36	2024-04-23
INV0449	Customer_090	2024-03-25	5083.78	2024-04-24
INV0450	Customer_005	2024-03-26	5562.37	2024-04-25
INV0451	Customer_073	2024-03-27	7186.51	2024-04-26
INV0452	Customer_046	2024-03-28	6699.55	2024-04-27
INV0453	Customer_014	2024-03-29	8296.49	2024-04-28
INV0454	Customer_044	2024-03-30	1402.76	2024-04-29
INV0455	Customer_063	2024-03-31	3667.97	2024-04-30
INV0456	Customer_094	2024-04-01	3521.21	2024-05-01
INV0457	Customer_052	2024-04-02	2314.15	2024-05-02
INV0458	Customer_026	2024-04-03	3602.6	2024-05-03
INV0459	Customer_053	2024-04-04	3787.89	2024-05-04
INV0460	Customer_029	2024-04-05	5696.96	2024-05-05
INV0461	Customer_019	2024-04-06	6973.34	2024-05-06
INV0462	Customer_047	2024-04-07	4429.9	2024-05-07
INV0463	Customer_008	2024-04-08	7475.23	2024-05-08
INV0464	Customer_023	2024-04-09	4025.49	2024-05-09
INV0465	Customer_035	2024-04-10	3612.55	2024-05-10
INV0466	Customer_095	2024-04-11	5870.69	2024-05-11
INV0467	Customer_053	2024-04-12	1213.45	2024-05-12
INV0468	Customer_099	2024-04-13	1718.1	2024-05-13
INV0469	Customer_096	2024-04-14	4761.73	2024-05-14
INV0470	Customer_058	2024-04-15	9486.21	2024-05-15
INV0471	Customer_005	2024-04-16	7493.61	2024-05-16
INV0472	Customer_016	2024-04-17	1793.14	2024-05-17
INV0473	Customer_017	2024-04-18	8616.86	2024-05-18
INV0474	Customer_032	2024-04-19	7590.71	2024-05-19
INV0475	Customer_096	2024-04-20	6498.52	2024-05-20
INV0476	Customer_052	2024-04-21	8382.64	2024-05-21
INV0477	Customer_020	2024-04-22	4636.99	2024-05-22
INV0478	Customer_066	2024-04-23	2993.51	2024-05-23
INV0479	Customer_084	2024-04-24	5608.21	2024-05-24
INV0480	Customer_082	2024-04-25	5939.58	2024-05-25
INV0481	Customer_001	2024-04-26	5844.94	2024-05-26
INV0482	Customer_058	2024-04-27	6085.66	2024-05-27
INV0483	Customer_093	2024-04-28	9538.34	2024-05-28
INV0484	Customer_093	2024-04-29	9120.21	2024-05-29
INV0485	Customer_083	2024-04-30	8881.45	2024-05-30
INV0486	Customer_044	2024-05-01	8212.75	2024-05-31
INV0487	Customer_006	2024-05-02	9490.85	2024-06-01
INV0488	Customer_050	2024-05-03	1886.45	2024-06-02
INV0489	Customer_072	2024-05-04	3386.11	2024-06-03
INV0490	Customer_088	2024-05-05	5455.5	2024-06-04
INV0491	Customer_020	2024-05-06	8618.81	2024-06-05
INV0492	Customer_014	2024-05-07	5546.49	2024-06-06
INV0493	Customer_005	2024-05-08	7732.31	2024-06-07
INV0494	Customer_041	2024-05-09	2250.64	2024-06-08
INV0495	Customer_040	2024-05-10	3271.72	2024-06-09
INV0496	Customer_034	2024-05-11	7585.98	2024-06-10
INV0497	Customer_080	2024-05-12	2482.61	2024-06-11
INV0498	Customer_045	2024-05-13	4162.2	2024-06-12
INV0499	Customer_071	2024-05-14	3383.8	2024-06-13
