# Supplementary material
Source: ML conference proceedings conference paper supplement (https://openreview.net/forum?id=xggSxCFQbA)
Supplement: supplementary_material [file payments.xlsx]

## Sheet: Sheet1
Payment_ID	Date	Amount	Reference
PMT0000	2023-01-29	4617.57	INV0000
PMT0001	2023-02-03	8611.7	INV0001
PMT0002	2023-02-02	4116.39	INV0002
PMT0003	2023-02-03	6891.59	INV0003
PMT0004	2023-02-04	7383.83	INV0004
PMT0005	2023-02-08	6275.64	INV0005
PMT0006	2023-02-06	4215.18	INV0006
PMT0007	2023-02-10	6193.48	INV0007
PMT0008	2023-02-06	4080.39	INV0008
PMT0009	2023-02-06	1754.86	INV0009
PMT0010	2023-02-05	9935.24	INV0010
PMT0011	2023-02-11	2144.64	INV0011
PMT0012	2023-02-09	1651.14	INV0012
PMT0013	2023-02-10	8906.78	INV0013
PMT0014	2023-02-18	3716.51	INV0014
PMT0015	2023-02-17	6852.67	INV0015
PMT0016	2023-02-21	8484.14	INV0016,INV0017
PMT0017	2023-02-16	3359.02	INV0018
PMT0018	2023-02-22	1517.67	INV0019 (Partial)
PMT0019	2023-03-02	2569.73	INV0019 (Remaining)
PMT0020	2023-02-17	4731.91	INV0020
PMT0021	2023-02-20	7483.74	INV0021
PMT0022	2023-02-25	15095.9	INV0022,INV0023
PMT0023	2023-02-25	6904.53	INV0024,INV0025
PMT0024	2023-02-23	6281.42	INV0026
PMT0025	2023-02-27	9281.77	INV0027
PMT0026	2023-02-26	604.15	INV0028 (Partial)
PMT0027	2023-03-09	838.28	INV0028 (Remaining)
PMT0028	2023-03-02	14844.2	INV0029,INV0030
PMT0029	2023-02-28	3177.35	INV0031
PMT0030	2023-03-05	8886.63	INV0032
PMT0031	2023-02-28	1171.39	INV0033
PMT0032	2023-03-06	16990.1	INV0034,INV0035
PMT0033	2023-03-04	6914.78	INV0036
PMT0034	2023-03-09	4951.26	INV0037
PMT0035	2023-03-10	1403.93	INV0038
PMT0036	2023-03-12	9281.02	INV0039
PMT0037	2023-03-16	6493.64	INV0040,INV0041
PMT0038	2023-03-17	7208.39	INV0042
PMT0039	2023-03-17	5336.54	INV0043
PMT0040	2023-03-15	2119.11	INV0044
PMT0041	2023-03-21	2928.45	INV0045
PMT0042	2023-03-16	939.18	INV0046 (Partial)
PMT0043	2023-04-01	641.24	INV0046 (Remaining)
PMT0044	2023-03-17	6168.64	INV0047
PMT0045	2023-03-19	6598.27	INV0048
PMT0046	2023-03-21	5551.68	INV0049
PMT0047	2023-03-17	8353.92	INV0050
PMT0048	2023-03-25	8749.08	INV0051
PMT0049	2023-03-22	7655.43	INV0052,INV0053
PMT0050	2023-03-28	12019.1	INV0054,INV0055
PMT0051	2023-03-26	6090.02	INV0056
PMT0052	2023-03-29	3006.2	INV0057 (Partial)
PMT0053	2023-04-07	3835.53	INV0057 (Remaining)
PMT0054	2023-03-30	4152.13	INV0058
PMT0055	2023-03-26	9253.89	INV0059
PMT0056	2023-03-28	2205.77	INV0060
PMT0057	2023-03-29	3768.37	INV0061 (Partial)
PMT0058	2023-04-07	3275.24	INV0061 (Remaining)
PMT0059	2023-03-30	1039.24	INV0062
PMT0060	2023-04-05	9321.86	INV0063
PMT0061	2023-04-01	2012.54	INV0064
PMT0062	2023-04-04	1853.96	INV0065
PMT0063	2023-04-04	3997.07	INV0066
PMT0064	2023-04-05	4362.1	INV0067
PMT0065	2023-04-10	1125.07	INV0068 (Partial)
PMT0066	2023-04-20	1803.63	INV0068 (Remaining)
PMT0067	2023-04-11	6252.8	INV0069
PMT0068	2023-04-13	2433.78	INV0070 (Partial)
PMT0069	2023-04-18	2552.45	INV0070 (Remaining)
PMT0070	2023-04-08	1307.58	INV0071
PMT0071	2023-04-17	3876.87	INV0072
PMT0072	2023-04-16	8293.9	INV0073
PMT0073	2023-04-19	7207.31	INV0074
PMT0074	2023-04-12	7523.84	INV0075
PMT0075	2023-04-17	7283.05	INV0076
PMT0076	2023-04-22	3798.76	INV0077
PMT0077	2023-04-16	1896.98	INV0078
PMT0078	2023-04-20	3452.2	INV0079
PMT0079	2023-04-19	4279.49	INV0080 (Partial)
PMT0080	2023-05-01	4206.58	INV0080 (Remaining)
PMT0081	2023-04-22	9824.24	INV0081
PMT0082	2023-04-27	5444.62	INV0082
PMT0083	2023-04-27	350.13	INV0083 (Partial)
PMT0084	2023-05-02	737.17	INV0083 (Remaining)
PMT0085	2023-04-24	2267.35	INV0084
PMT0086	2023-04-25	10106	INV0085,INV0086
PMT0087	2023-04-30	1675.84	INV0087
PMT0088	2023-04-25	9490.22	INV0088
PMT0089	2023-05-03	4285.75	INV0089
PMT0090	2023-04-28	9213.26	INV0090
PMT0091	2023-04-29	8024.7	INV0091
PMT0092	2023-05-01	7798.94	INV0092
PMT0093	2023-04-30	6460.48	INV0093
PMT0094	2023-05-02	6641.05	INV0094
PMT0095	2023-05-03	6742.03	INV0095
PMT0096	2023-05-08	6658.49	INV0096
PMT0097	2023-05-03	5983.55	INV0097
PMT0098	2023-05-04	9877.73	INV0098
PMT0099	2023-05-09	7590.62	INV0099
PMT0100	2023-05-12	7992.52	INV0100
PMT0101	2023-05-16	8852.17	INV0101
PMT0102	2023-05-08	2940.76	INV0102
PMT0103	2023-05-10	7100.29	INV0103,INV0104
PMT0104	2023-05-13	5626.73	INV0105
PMT0105	2023-05-19	8462.64	INV0106
PMT0106	2023-05-16	4994.05	INV0107
PMT0107	2023-05-17	6114.73	INV0108
PMT0108	2023-05-24	3934.05	INV0109 (Partial)
PMT0109	2023-05-26	1809.59	INV0109 (Remaining)
PMT0110	2023-05-18	1337.78	INV0110
PMT0111	2023-05-21	6536.93	INV0111
PMT0112	2023-05-20	8452.39	INV0112
PMT0113	2023-05-23	2417.5	INV0113
PMT0114	2023-05-25	6348.99	INV0114
PMT0115	2023-05-28	6342.49	INV0115
PMT0116	2023-05-27	2477.66	INV0116
PMT0117	2023-05-28	2111.17	INV0117
PMT0118	2023-06-02	9820.47	INV0118
PMT0119	2023-06-03	4543.47	INV0119
PMT0120	2023-05-29	3046.8	INV0120
PMT0121	2023-05-31	2541.92	INV0121
PMT0122	2023-06-01	7008.42	INV0122
PMT0123	2023-06-03	6485.01	INV0123
PMT0124	2023-06-07	4351.99	INV0124 (Partial)
PMT0125	2023-06-13	2439.98	INV0124 (Remaining)
PMT0126	2023-06-08	1792.05	INV0125
PMT0127	2023-06-03	9041.81	INV0126
PMT0128	2023-06-04	4503.4	INV0127
PMT0129	2023-06-11	3820.32	INV0128
PMT0130	2023-06-13	9671.84	INV0129,INV0130
PMT0131	2023-06-13	8772.19	INV0131
PMT0132	2023-06-09	9363.35	INV0132
PMT0133	2023-06-12	3731.08	INV0133
PMT0134	2023-06-16	8775.42	INV0134
PMT0135	2023-06-14	17411	INV0135,INV0136
PMT0136	2023-06-20	3211.75	INV0137
PMT0137	2023-06-20	6192.63	INV0138
PMT0138	2023-06-23	11887.8	INV0139,INV0140
PMT0139	2023-06-19	1047.67	INV0141
PMT0140	2023-06-19	6083.37	INV0142
PMT0141	2023-06-21	4052.83	INV0143
PMT0142	2023-06-21	3904.15	INV0144
PMT0143	2023-06-28	6804.16	INV0145
PMT0144	2023-06-30	8663.36	INV0146
PMT0145	2023-07-01	6482.98	INV0147
PMT0146	2023-06-28	8678.56	INV0148
PMT0147	2023-06-25	3381.37	INV0149
PMT0148	2023-06-26	5675.52	INV0150
PMT0149	2023-07-05	5054.83	INV0151
PMT0150	2023-06-28	7116.11	INV0152,INV0153
PMT0151	2023-07-01	6953.72	INV0154
PMT0152	2023-06-30	6327.23	INV0155
PMT0153	2023-07-08	13768.6	INV0156,INV0157
PMT0154	2023-07-08	1600.75	INV0158
PMT0155	2023-07-09	2048.01	INV0159
PMT0156	2023-07-11	6368.27	INV0160
PMT0157	2023-07-14	3474.81	INV0161
PMT0158	2023-07-11	1716.81	INV0162
PMT0159	2023-07-15	4866.42	INV0163
PMT0160	2023-07-14	5988.9	INV0164
PMT0161	2023-07-18	3958.71	INV0165
PMT0162	2023-07-11	7483.9	INV0166
PMT0163	2023-07-19	6793.94	INV0167
PMT0164	2023-07-19	3995.37	INV0168
PMT0165	2023-07-21	7793.85	INV0169
PMT0166	2023-07-24	6838.26	INV0170
PMT0167	2023-07-19	6737.01	INV0171
PMT0168	2023-07-26	5980.85	INV0172
PMT0169	2023-07-23	1102.51	INV0173
PMT0170	2023-07-25	7268.56	INV0174
PMT0171	2023-07-23	13867.9	INV0175,INV0176
PMT0172	2023-07-22	8361.86	INV0177
PMT0173	2023-07-27	6289.25	INV0178
PMT0174	2023-08-01	1663.43	INV0179 (Partial)
PMT0175	2023-08-12	1606.21	INV0179 (Remaining)
PMT0176	2023-07-25	2833.46	INV0180
PMT0177	2023-07-26	4063.46	INV0181
PMT0178	2023-08-02	5289.11	INV0182
PMT0179	2023-08-03	3664.59	INV0183
PMT0180	2023-08-05	5634.37	INV0184
PMT0181	2023-08-03	12287.8	INV0185,INV0186
PMT0182	2023-08-02	1971.32	INV0187
PMT0183	2023-08-11	9387.5	INV0188
PMT0184	2023-08-12	9222.2	INV0189
PMT0185	2023-08-06	5728.24	INV0190
PMT0186	2023-08-06	7524.19	INV0191
PMT0187	2023-08-10	2191.24	INV0192 (Partial)
PMT0188	2023-08-17	2733.19	INV0192 (Remaining)
PMT0189	2023-08-16	6670.31	INV0193
PMT0190	2023-08-12	4065.18	INV0194
PMT0191	2023-08-14	3710.43	INV0195
PMT0192	2023-08-13	6204.07	INV0196
PMT0193	2023-08-16	5483.17	INV0197
PMT0194	2023-08-18	6215.83	INV0198
PMT0195	2023-08-18	3579.95	INV0199
PMT0196	2023-08-15	4302.62	INV0200
PMT0197	2023-08-18	1755.08	INV0201
PMT0198	2023-08-18	1470.49	INV0202
PMT0199	2023-08-18	4949.33	INV0203,INV0204
PMT0200	2023-08-28	10250.3	INV0205,INV0206
PMT0201	2023-08-22	1349.86	INV0207
PMT0202	2023-08-28	10383.5	INV0208,INV0209
PMT0203	2023-09-02	8843.91	INV0210
PMT0204	2023-09-02	9115.12	INV0211,INV0212
PMT0205	2023-09-05	10096.4	INV0213,INV0214
PMT0206	2023-09-06	6078.71	INV0215
PMT0207	2023-08-30	2030.8	INV0216
PMT0208	2023-09-03	9972.91	INV0217
PMT0209	2023-09-02	8964.08	INV0218,INV0219
PMT0210	2023-09-10	7391.89	INV0220
PMT0211	2023-09-10	4275.09	INV0221
PMT0212	2023-09-08	8499.47	INV0222
PMT0213	2023-09-09	5088.44	INV0223
PMT0214	2023-09-08	7476.03	INV0224
PMT0215	2023-09-14	1967.08	INV0225
PMT0216	2023-09-14	8615.07	INV0226
PMT0217	2023-09-16	7621.46	INV0227
PMT0218	2023-09-14	2905.45	INV0228
PMT0219	2023-09-18	2307.57	INV0229
PMT0220	2023-09-22	2659.55	INV0230 (Partial)
PMT0221	2023-10-01	1187.08	INV0230 (Remaining)
PMT0222	2023-09-19	9784.64	INV0231
PMT0223	2023-09-17	3311.48	INV0232
PMT0224	2023-09-24	5105.14	INV0233
PMT0225	2023-09-17	1270.18	INV0234
PMT0226	2023-09-24	4575.05	INV0235
PMT0227	2023-09-24	6141.88	INV0236
PMT0228	2023-09-22	9578.12	INV0237
PMT0229	2023-09-23	5650.62	INV0238
PMT0230	2023-10-01	14296.1	INV0239,INV0240
PMT0231	2023-09-25	504.01	INV0241 (Partial)
PMT0232	2023-10-09	863.06	INV0241 (Remaining)
PMT0233	2023-10-01	3872.68	INV0242
PMT0234	2023-10-04	15735.3	INV0243,INV0244
PMT0235	2023-10-07	11787.4	INV0245,INV0246
PMT0236	2023-10-08	2980.99	INV0247
PMT0237	2023-10-09	2810.56	INV0248
PMT0238	2023-10-09	9302.49	INV0249
PMT0239	2023-10-07	8674	INV0250
PMT0240	2023-10-05	7973.95	INV0251
PMT0241	2023-10-06	4534.62	INV0252
PMT0242	2023-10-13	5539.43	INV0253
PMT0243	2023-10-09	5178.99	INV0254
PMT0244	2023-10-14	3280.58	INV0255
PMT0245	2023-10-16	5545.25	INV0256
PMT0246	2023-10-17	1274.47	INV0257
PMT0247	2023-10-19	2186.29	INV0258
PMT0248	2023-10-13	8979.31	INV0259
PMT0249	2023-10-14	7765.12	INV0260
PMT0250	2023-10-20	4805.82	INV0261
PMT0251	2023-10-18	5654.35	INV0262
PMT0252	2023-10-17	2031.38	INV0263 (Partial)
PMT0253	2023-10-30	2298.61	INV0263 (Remaining)
PMT0254	2023-10-25	15724.7	INV0264,INV0265
PMT0255	2023-10-22	3811.77	INV0266 (Partial)
PMT0256	2023-11-02	4057.8	INV0266 (Remaining)
PMT0257	2023-10-21	7503.51	INV0267
PMT0258	2023-10-30	2840.54	INV0268
PMT0259	2023-10-28	4041.73	INV0269
PMT0260	2023-10-23	5228.61	INV0270
PMT0261	2023-10-30	3977.14	INV0271
PMT0262	2023-10-26	7794.46	INV0272
PMT0263	2023-11-02	3964.18	INV0273
PMT0264	2023-11-04	1162.98	INV0274 (Partial)
PMT0265	2023-11-06	1081.11	INV0274 (Remaining)
PMT0266	2023-10-31	4591.36	INV0275
PMT0267	2023-10-31	9819.23	INV0276
PMT0268	2023-10-31	3032.93	INV0277
PMT0269	2023-11-07	11406.2	INV0278,INV0279
PMT0270	2023-11-05	1639.22	INV0280
PMT0271	2023-11-12	5390.89	INV0281
PMT0272	2023-11-04	7348.62	INV0282
PMT0273	2023-11-13	5618.98	INV0283
PMT0274	2023-11-11	4735.55	INV0284 (Partial)
PMT0275	2023-11-22	4113.4	INV0284 (Remaining)
PMT0276	2023-11-13	2061.64	INV0285 (Partial)
PMT0277	2023-11-17	1538.79	INV0285 (Remaining)
PMT0278	2023-11-12	1776.24	INV0286
PMT0279	2023-11-18	9429.09	INV0287
PMT0280	2023-11-19	4403.77	INV0288
PMT0281	2023-11-16	14315.7	INV0289,INV0290
PMT0282	2023-11-19	3918.82	INV0291
PMT0283	2023-11-22	7445.48	INV0292
PMT0284	2023-11-20	2218.77	INV0293
PMT0285	2023-11-21	2039.08	INV0294 (Partial)
PMT0286	2023-11-27	1582.56	INV0294 (Remaining)
PMT0287	2023-11-22	2302.4	INV0295
PMT0288	2023-11-20	8301.08	INV0296
PMT0289	2023-11-28	10460.5	INV0297,INV0298
PMT0290	2023-11-30	9489.69	INV0299
PMT0291	2023-11-22	5749.95	INV0300
PMT0292	2023-11-30	5860.26	INV0301
PMT0293	2023-11-29	5149.3	INV0302
PMT0294	2023-11-30	3933.01	INV0303
PMT0295	2023-12-04	5280.9	INV0304
PMT0296	2023-12-06	6425.27	INV0305
PMT0297	2023-12-06	9804.2	INV0306
PMT0298	2023-12-04	9439.88	INV0307
PMT0299	2023-12-03	8759.38	INV0308
PMT0300	2023-12-10	9002.17	INV0309
PMT0301	2023-12-05	2588.82	INV0310 (Partial)
PMT0302	2023-12-12	2621.82	INV0310 (Remaining)
PMT0303	2023-12-11	6917	INV0311
PMT0304	2023-12-13	5564.42	INV0312 (Partial)
PMT0305	2023-12-21	3491.18	INV0312 (Remaining)
PMT0306	2023-12-12	4536.56	INV0313
PMT0307	2023-12-06	5899.52	INV0314 (Partial)
PMT0308	2023-12-16	3756.34	INV0314 (Remaining)
PMT0309	2023-12-10	4742.07	INV0315
PMT0310	2023-12-08	6409.74	INV0316
PMT0311	2023-12-11	7388.24	INV0317
PMT0312	2023-12-11	9555.33	INV0318
PMT0313	2023-12-19	3201.55	INV0319
PMT0314	2023-12-17	13402.5	INV0320,INV0321
PMT0315	2023-12-18	3417.01	INV0322
PMT0316	2023-12-18	7989.46	INV0323
PMT0317	2023-12-23	5970	INV0324
PMT0318	2023-12-25	6948.76	INV0325
PMT0319	2023-12-19	3906.11	INV0326
PMT0320	2023-12-27	5331.47	INV0327
PMT0321	2023-12-23	6556.19	INV0328
PMT0322	2023-12-30	4644.2	INV0329
PMT0323	2023-12-28	2785.35	INV0330
PMT0324	2023-12-31	9654.76	INV0331
PMT0325	2023-12-30	5603.21	INV0332
PMT0326	2024-01-02	7605.28	INV0333
PMT0327	2024-01-02	4699.42	INV0334
PMT0328	2024-01-02	4196.19	INV0335
PMT0329	2024-01-02	4664.48	INV0336
PMT0330	2024-01-06	4682.77	INV0337
PMT0331	2023-12-31	5897.62	INV0338
PMT0332	2024-01-09	5891.23	INV0339
PMT0333	2024-01-06	5474.38	INV0340
PMT0334	2024-01-06	1127.77	INV0341 (Partial)
PMT0335	2024-01-16	1085.3	INV0341 (Remaining)
PMT0336	2024-01-09	5464.68	INV0342
PMT0337	2024-01-06	2521.94	INV0343
PMT0338	2024-01-12	2135.22	INV0344
PMT0339	2024-01-15	9393.81	INV0345
PMT0340	2024-01-11	13380	INV0346,INV0347
PMT0341	2024-01-15	4616.14	INV0348
PMT0342	2024-01-18	15922.2	INV0349,INV0350
PMT0343	2024-01-21	5346.48	INV0351 (Partial)
PMT0344	2024-01-31	2576.05	INV0351 (Remaining)
PMT0345	2024-01-14	13957.2	INV0352,INV0353
PMT0346	2024-01-24	8384.15	INV0354
PMT0347	2024-01-16	8685.54	INV0355
PMT0348	2024-01-26	5988.42	INV0356,INV0357
PMT0349	2024-01-27	3570.64	INV0358
PMT0350	2024-01-26	3438.18	INV0359
PMT0351	2024-01-27	8698.67	INV0360
PMT0352	2024-01-27	1286.96	INV0361
PMT0353	2024-01-28	1684.9	INV0362
PMT0354	2024-01-29	6264.09	INV0363,INV0364
PMT0355	2024-01-30	3086.74	INV0365
PMT0356	2024-02-02	14249.6	INV0366,INV0367
PMT0357	2024-02-03	1051.94	INV0368
PMT0358	2024-02-07	4863.9	INV0369
PMT0359	2024-02-03	4670.96	INV0370
PMT0360	2024-02-05	2025.51	INV0371
PMT0361	2024-02-05	7085.28	INV0372
PMT0362	2024-02-06	7318.87	INV0373
PMT0363	2024-02-05	7488.04	INV0374
PMT0364	2024-02-10	7556.24	INV0375
PMT0365	2024-02-11	1000.48	INV0376
PMT0366	2024-02-12	9585.29	INV0377
PMT0367	2024-02-15	8327.88	INV0378
PMT0368	2024-02-09	9135.84	INV0379
PMT0369	2024-02-14	1144.85	INV0380
PMT0370	2024-02-17	17692.8	INV0381,INV0382
PMT0371	2024-02-16	8534.97	INV0383
PMT0372	2024-02-19	1839.59	INV0384
PMT0373	2024-02-18	3318.82	INV0385 (Partial)
PMT0374	2024-02-28	4330.18	INV0385 (Remaining)
PMT0375	2024-02-25	4719.07	INV0386 (Partial)
PMT0376	2024-02-27	4920.18	INV0386 (Remaining)
PMT0377	2024-02-18	7106.93	INV0387
PMT0378	2024-02-24	6111.29	INV0388
PMT0379	2024-02-23	9510.67	INV0389
PMT0380	2024-02-23	4986.43	INV0390
PMT0381	2024-02-27	6393.64	INV0391
PMT0382	2024-02-22	5276.14	INV0392
PMT0383	2024-02-24	9395.62	INV0393
PMT0384	2024-02-28	1684.76	INV0394
PMT0385	2024-03-01	5510.08	INV0395
PMT0386	2024-02-26	7182.57	INV0396
PMT0387	2024-03-07	8127.16	INV0397
PMT0388	2024-03-08	15427.4	INV0398,INV0399
PMT0389	2024-03-02	9477.92	INV0400
PMT0390	2024-03-06	1578.87	INV0401
PMT0391	2024-03-10	4621.33	INV0402
PMT0392	2024-03-13	1211.13	INV0403
PMT0393	2024-03-13	3964.75	INV0404
PMT0394	2024-03-11	5831.81	INV0405
PMT0395	2024-03-14	6102.81	INV0406 (Partial)
PMT0396	2024-03-17	3094.34	INV0406 (Remaining)
PMT0397	2024-03-15	10766.5	INV0407,INV0408
PMT0398	2024-03-17	1837.27	INV0409
PMT0399	2024-03-17	6303.41	INV0410
PMT0400	2024-03-13	5789.06	INV0411
PMT0401	2024-03-15	12492.5	INV0412,INV0413
PMT0402	2024-03-21	9276.82	INV0414
PMT0403	2024-03-23	13636.2	INV0415,INV0416
PMT0404	2024-03-19	4455.54	INV0417
PMT0405	2024-03-23	3094.28	INV0418 (Partial)
PMT0406	2024-03-31	4537.07	INV0418 (Remaining)
PMT0407	2024-03-27	5283.48	INV0419
PMT0408	2024-03-22	2103.25	INV0420
PMT0409	2024-03-25	9311.22	INV0421
PMT0410	2024-04-01	5086.87	INV0422
PMT0411	2024-03-31	7610.38	INV0423
PMT0412	2024-03-25	4304.56	INV0424
PMT0413	2024-04-01	1169.93	INV0425
PMT0414	2024-04-03	1904.77	INV0426
PMT0415	2024-03-31	5465.98	INV0427
PMT0416	2024-04-05	4331.93	INV0428 (Partial)
PMT0417	2024-04-15	2877.75	INV0428 (Remaining)
PMT0418	2024-04-07	4012.62	INV0429
PMT0419	2024-04-09	7259.4	INV0430
PMT0420	2024-04-10	7287.72	INV0431
PMT0421	2024-04-02	7335.42	INV0432
PMT0422	2024-04-03	5432.7	INV0433
PMT0423	2024-04-12	9233.98	INV0434
PMT0424	2024-04-10	5402.77	INV0435
PMT0425	2024-04-09	7846.82	INV0436,INV0437
PMT0426	2024-04-12	5149.91	INV0438,INV0439
PMT0427	2024-04-12	6701.82	INV0440
PMT0428	2024-04-20	3236.82	INV0441
PMT0429	2024-04-17	11674.7	INV0442,INV0443
PMT0430	2024-04-18	3944.99	INV0444
PMT0431	2024-04-24	3179.76	INV0445
PMT0432	2024-04-16	2521.52	INV0446
PMT0433	2024-04-26	7973.73	INV0447
PMT0434	2024-04-20	2167.36	INV0448
PMT0435	2024-04-23	5083.78	INV0449
PMT0436	2024-04-24	5562.37	INV0450
PMT0437	2024-04-25	7186.51	INV0451
PMT0438	2024-04-23	6699.55	INV0452
PMT0439	2024-05-02	8296.49	INV0453
PMT0440	2024-05-03	5070.73	INV0454,INV0455
PMT0441	2024-04-28	3521.21	INV0456
PMT0442	2024-05-05	2314.15	INV0457
PMT0443	2024-05-01	3602.6	INV0458
PMT0444	2024-05-08	1744.99	INV0459 (Partial)
PMT0445	2024-05-09	2042.9	INV0459 (Remaining)
PMT0446	2024-05-06	5696.96	INV0460
PMT0447	2024-05-02	6973.34	INV0461
PMT0448	2024-05-06	4429.9	INV0462
PMT0449	2024-05-06	7475.23	INV0463
PMT0450	2024-05-04	4025.49	INV0464
PMT0451	2024-05-13	3612.55	INV0465
PMT0452	2024-05-13	5870.69	INV0466
PMT0453	2024-05-08	2931.55	INV0467,INV0468
PMT0454	2024-05-11	4761.73	INV0469
PMT0455	2024-05-13	9486.21	INV0470
PMT0456	2024-05-13	3554.49	INV0471 (Partial)
PMT0457	2024-05-24	3939.12	INV0471 (Remaining)
PMT0458	2024-05-14	1793.14	INV0472
PMT0459	2024-05-14	3565.8	INV0473 (Partial)
PMT0460	2024-06-01	5051.06	INV0473 (Remaining)
PMT0461	2024-05-17	14089.2	INV0474,INV0475
PMT0462	2024-05-16	8382.64	INV0476
PMT0463	2024-05-19	4636.99	INV0477
PMT0464	2024-05-21	2993.51	INV0478
PMT0465	2024-05-25	5608.21	INV0479
PMT0466	2024-05-27	5939.58	INV0480
PMT0467	2024-05-22	5844.94	INV0481
PMT0468	2024-05-23	2024.07	INV0482 (Partial)
PMT0469	2024-06-02	4061.59	INV0482 (Remaining)
PMT0470	2024-05-26	4696.75	INV0483 (Partial)
PMT0471	2024-06-02	4841.59	INV0483 (Remaining)
PMT0472	2024-05-26	9120.21	INV0484
PMT0473	2024-06-01	8881.45	INV0485
PMT0474	2024-05-27	8212.75	INV0486
PMT0475	2024-06-05	9399.79	INV0487
PMT0476	2024-05-28	1886.45	INV0488
PMT0477	2024-06-07	3386.11	INV0489
PMT0478	2024-06-07	5455.5	INV0490
PMT0479	2024-06-03	14165.3	INV0491,INV0492
PMT0480	2024-06-03	7732.31	INV0493
PMT0481	2024-06-06	2250.64	INV0494
PMT0482	2024-06-13	3271.72	INV0495
PMT0483	2024-06-15	10068.6	INV0496,INV0497
PMT0484	2024-06-07	4162.2	INV0498
PMT0485	2024-06-11	3383.8	INV0499
