# Supplementary material
Source: ML conference proceedings conference paper supplement (https://openreview.net/forum?id=xggSxCFQbA)
Supplement: supplementary_material [file q3_metrics.xlsx]

## Sheet: Dashboard
Insights
Q3 revenue increased by 18%. Adoption of premium tier up by 32%.
