# Supplementary material
Source: ML conference proceedings conference paper supplement (https://openreview.net/forum?id=xggSxCFQbA)
Supplement: supplementary_material [file statement.docx]

Company Statement

This is the official statement for tomorrow's newsletter.
