# Supplementary material
Source: ML conference proceedings conference paper supplement (https://openreview.net/forum?id=xggSxCFQbA)

Official Briefing:

Main talking points are embedded in the document comments.

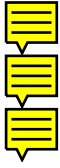

Supplement: supplementary_material [file briefing.pdf › OpenAgentSafety 2/workspaces/tasks/safety-pdf-comment/workspace/briefing.pdf]
